# Supplementary material for: Bioactivity Profiling and Untargeted Metabolomics of Microbiota Associated with Mesopelagic Jellyfish Periphylla periphylla
Source: MDPI journal article supplement (doi:10.3390/md21020129), 2023-02-17
Supplement: s1 [file s1]

## Bioactivity profiling and untargeted metabolomics of microbiota associated with mesopelagic jellyfish *Periphylla periphylla*

Ernest Oppong-Danquah <sup>1,†</sup>, Martina Miranda<sup>1,†</sup>, Martina Blümel <sup>1</sup> and Deniz Tasdemir <sup>1,2\*</sup>

<sup>1</sup> GEOMAR Centre for Marine Biotechnology (GEOMAR-Biotech), Research Unit Marine Natural Products Chemistry, GEOMAR Helmholtz Centre for Ocean Research Kiel, Am Kiel-Kanal 44, 24106 Kiel, Germany; eoппong-danquah@geomar.de; martinamiranda0608@gmail.com; mbluemel@geomar.de

<sup>2</sup> Faculty of Mathematics and Natural Science, Kiel University, Christian-Albrechts-Platz 4, 24118 Kiel, Germany

\* Correspondence: dtasdemir@geomar.de; Tel.: +49-431-6004430; ORCID ID: 0000-0002-7841-6271

† These authors have contributed equally

### List of Figures

Page

|                                                                                                                                                                                                                                                                                                             |   |
|-------------------------------------------------------------------------------------------------------------------------------------------------------------------------------------------------------------------------------------------------------------------------------------------------------------|---|
| <b>Figure S1.</b> Global molecular network highlighting nodes (ions) produced in the different cultivation conditions (GYM-liquid, GYM-solid, MB-liquid and MB-solid) by <i>Polaribacter</i> sp. and Venn diagram displaying the distribution of ions according to different cultivation conditions.        | 3 |
| <b>Figure S2.</b> Global molecular network highlighting nodes (ions) produced in the different cultivation conditions (GYM-liquid, GYM-solid, MB-liquid and MB-solid) by <i>Shewanella</i> sp. SU126 and Venn diagram displaying the distribution of ions according to different cultivation conditions.    | 4 |
| <b>Figure S3.</b> Global molecular network highlighting nodes (ions) produced in the different cultivation conditions (GYM-liquid, GYM-solid, MB-liquid and MB-solid) by <i>Psychrobacter</i> sp. SU137 and Venn diagram displaying the distribution of ions according to different cultivation conditions. | 5 |
| <b>Figure S4.</b> Global molecular network highlighting nodes (ions) produced in the different cultivation conditions (GYM-liquid, GYM-solid, MB-liquid and MB-solid) by <i>Psychrobacter</i> sp. SU143 and Venn diagram displaying the distribution of ions according to different cultivation conditions. | 6 |
| <b>Figure S5.</b> CFM-ID predicted MS/MS spectrum annotation of 12-hydroxy-3-ketocholanic acid ( <i>m/z</i> [M-H] <sup>-</sup> 389.2691) acquired by UPLC-QToF-MS/MS in negative ion mode.                                                                                                                  | 7 |

## **List of Tables**

|                                                                                                                                                                                                                                                                                                              |    |
|--------------------------------------------------------------------------------------------------------------------------------------------------------------------------------------------------------------------------------------------------------------------------------------------------------------|----|
| <b>Table S1.</b> Identification of 16 selected bacteria associated to the umbrella of <i>P. periphylla</i> according to the BLAST results from the NCBI nucleotide database                                                                                                                                  | 8  |
| <b>Table S2.</b> The IC <sub>50</sub> values (in µg/mL) of the 16 bacterial strain extracts against ESKAPE pathogens Efm: <i>Enterococcus faecium</i> ; MRSA, methicillin-resistant <i>Staphylococcus aureus</i> and the fish pathogens Lg: <i>Lactococcus garviae</i> and Vi: <i>Vibrio ichthyoenteri</i> . | 9  |
| <b>Table S3.</b> Putative annotation of metabolites produced by <i>Psychrobacter</i> sp. SU143, <i>Psychrobacter</i> sp. SU137, <i>Shewanella</i> sp. SU126 and <i>Polaribacter</i> sp. SU124 in the liquid and solid regime of MB and GYM media.                                                            | 11 |
| <b>References</b>                                                                                                                                                                                                                                                                                            | 20 |

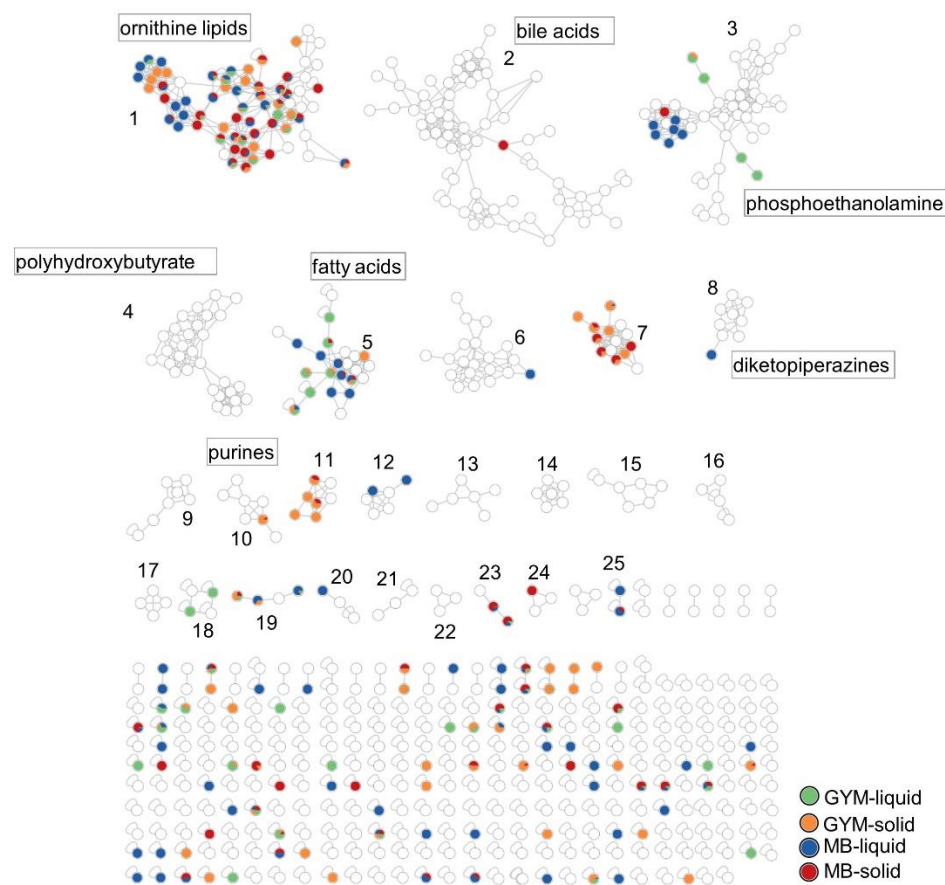

(a)

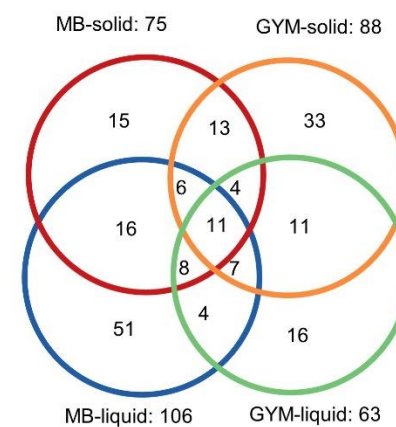

(b)

**Figure S1.** (a) Global molecular network highlighting nodes (ions) produced in the different cultivation conditions (GYM-liquid, GYM-solid, MB-liquid and MB-solid) by *Polaribacter* sp. Clusters (comprising nodes  $\geq 3$ ) are numbered 1 to 25 with putative annotations if any. Image is a merged MN from both positive and negative polarities. Non-colored nodes originate from the other isolates *Shewanella* sp. SU126, *Psychrobacter* sp. SU137 and *Psychrobacter* sp. SU143. (b) Venn diagram displaying the distribution of ions according to different cultivation conditions.

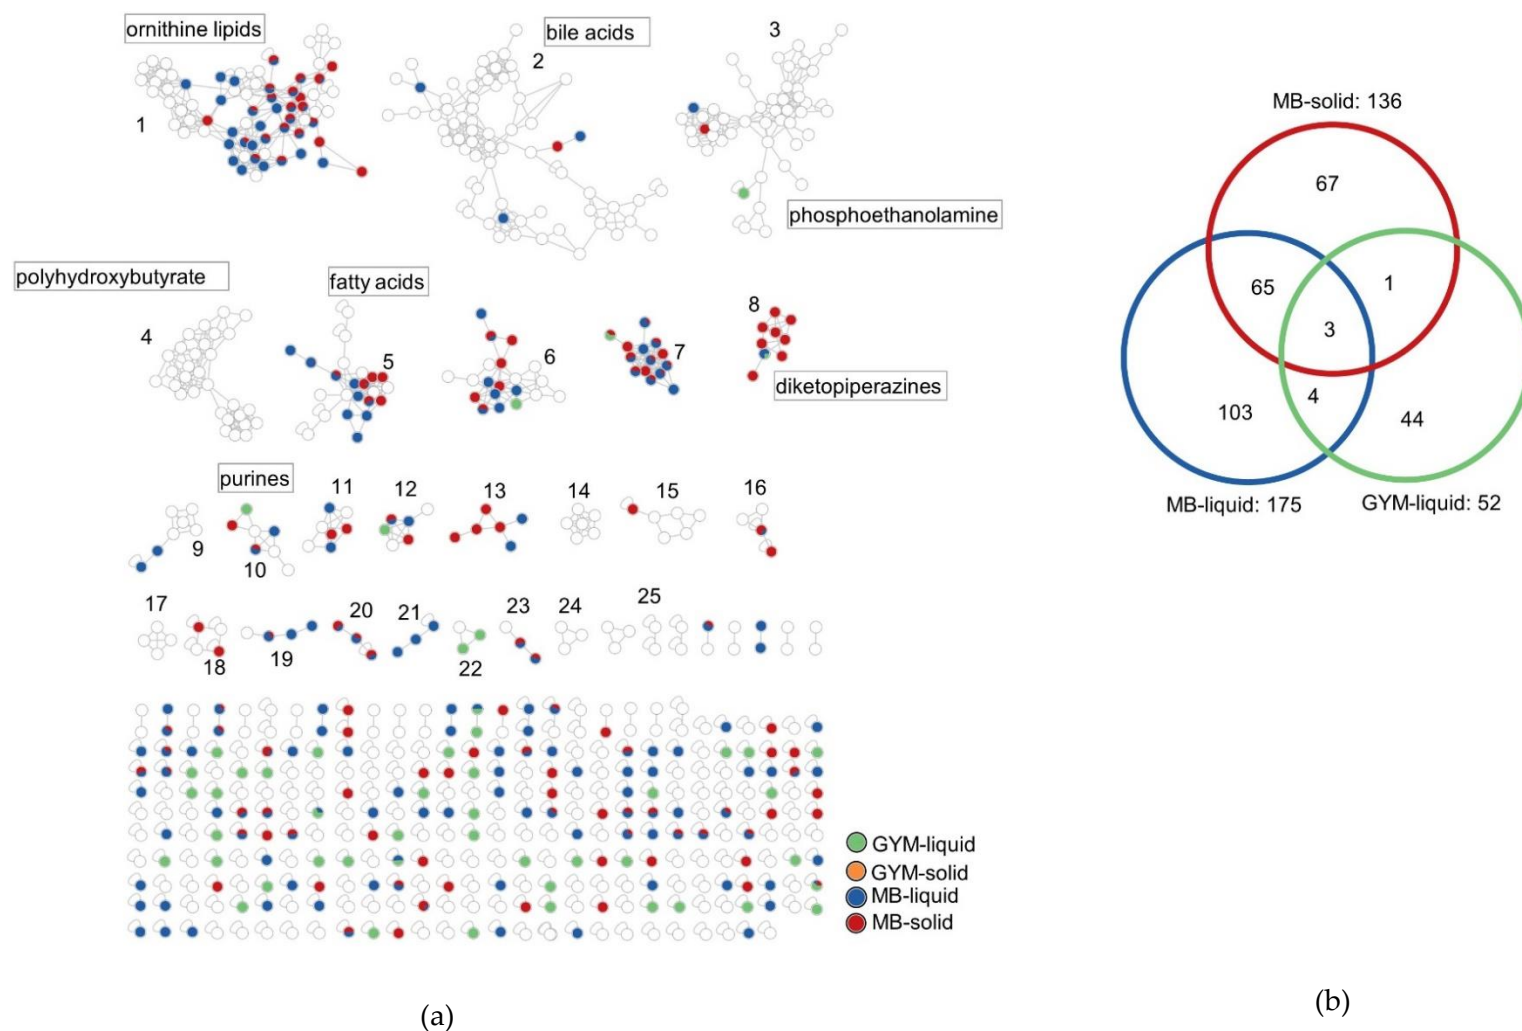

**Figure S2. (a)** Global molecular network highlighting nodes (ions) produced in the different cultivation conditions (GYM-liquid, GYM-solid, MB-liquid and MB-solid) by *Shewanella* sp. SU126. Clusters (comprising nodes  $\geq 3$ ) are numbered 1 to 25 with putative annotations if any. Image is a merged MN from both positive and negative polarities. Non-colored nodes originate from the other isolates *Polaribacter* sp. SU124, *Psychrobacter* sp. SU137 and *Psychrobacter* sp. SU143. (b) Venn diagram displaying the distribution of ions according to different cultivation conditions.

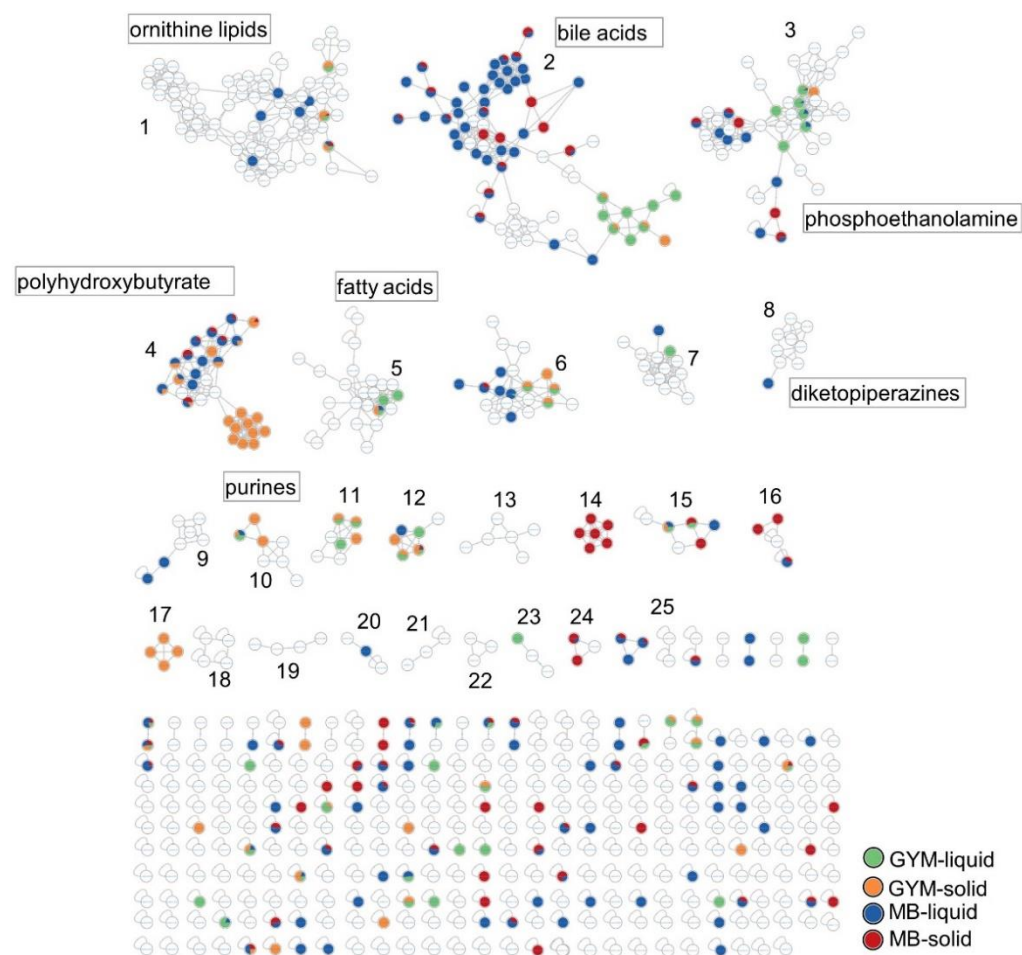

(a)

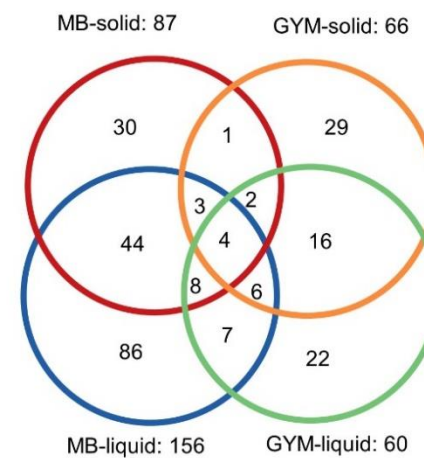

(b)

**Figure S3. (a)** Global molecular network highlighting nodes (ions) produced in the different cultivation conditions (GYM-liquid, GYM-solid, MB-liquid and MB-solid) by *Psychrobacter* sp. SU137. Clusters (comprising nodes  $\geq 3$ ) are numbered 1 to 25 with putative annotations if any. Image is a merged MN from both positive and negative polarities. Non-colored nodes originate from the other isolates *Polaribacter* sp. SU124, *Shewanella* sp. SU126, and *Psychrobacter* sp. SU143. **(b)** Venn diagram displaying the distribution of ions according to different cultivation conditions.

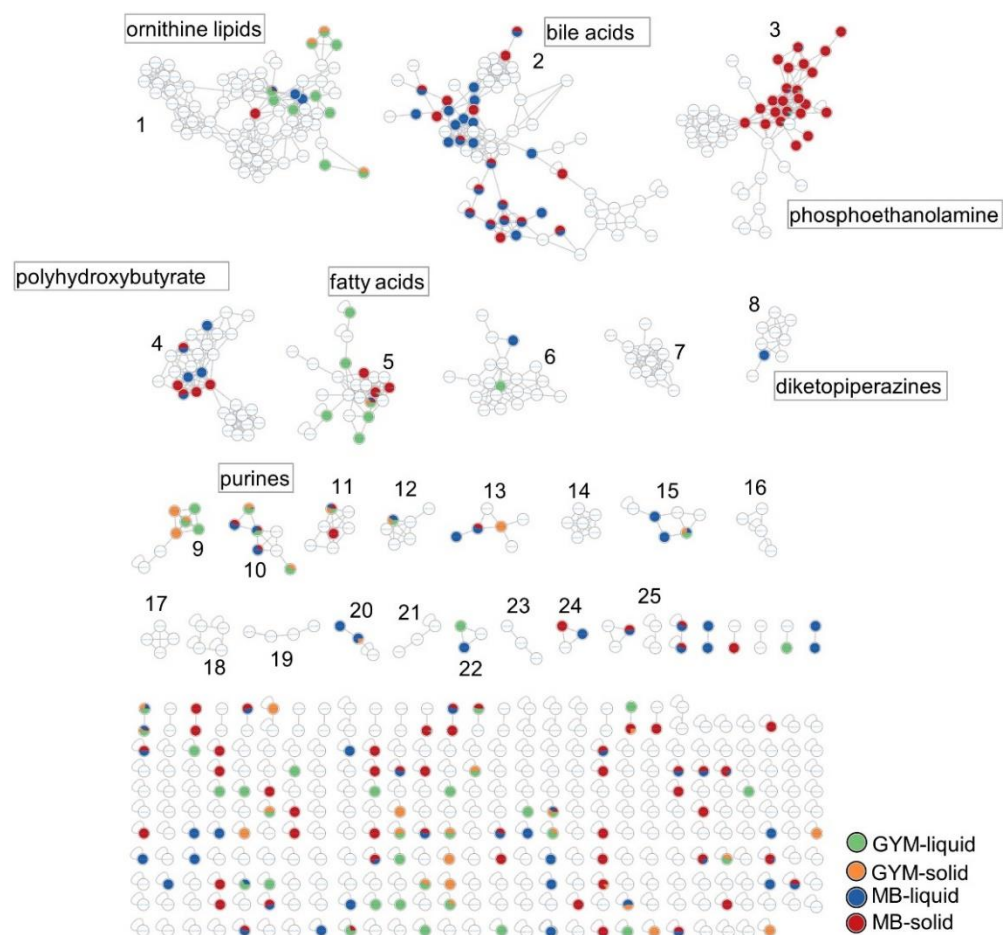

(a)

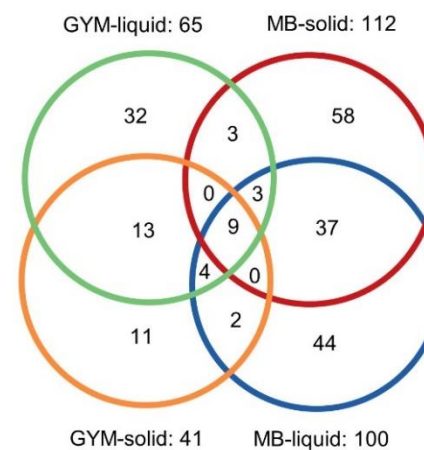

(b)

**Figure S4.** (a) Global molecular network highlighting nodes (ions) produced in the different cultivation conditions (GYM-liquid, GYM-solid, MB-liquid and MB-solid) by *Psychrobacter* sp. SU143. Clusters (comprising nodes  $\geq 3$ ) are numbered 1 to 25 with putative annotations if any. Image is a merged MN from both positive and negative polarities. Non-colored nodes originate from the other isolates *Polaribacter* sp. SU124, *Shewanella* sp. SU126, and *Psychrobacter* sp. SU137. (b) Venn diagram displaying the distribution of ions according to different cultivation conditions.



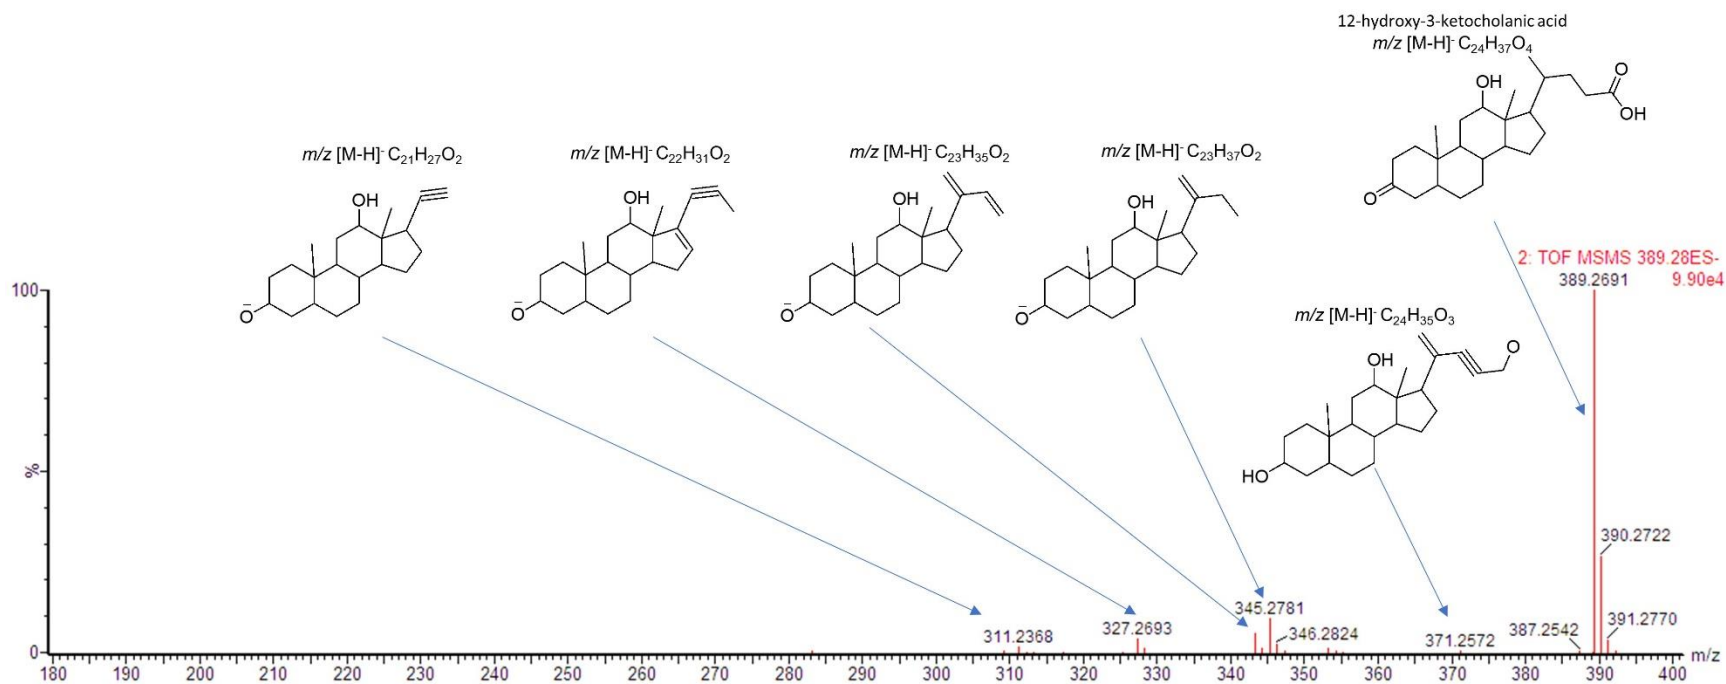

**Figure S5.** CFM-ID predicted MS/MS spectrum annotation of 12-hydroxy-3-ketocholanic acid ( $m/z$  [M-H]<sup>-</sup> 389.2691) acquired by UPLC–QToF–MS/MS in negative ion mode.

7

**Table S1.** Identification of 16 selected bacteria associated to the umbrella of *P. periphylla* according to the BLAST results from the NCBI nucleotide database. The table displays the first 3 hits from two BLAST searches, one against all database entries and the second against type strains only. MB: Marine broth; HS: Hastings medium, WSP: Wickerham medium, %: percent similarity to database hit, Acc. No.: accession numbers

| Strain ID | Source         | Isolation Medium | Seq. length | BLAST result (highly similar)                        | %    | Acc. No.                    | BLAST result TYPE strain (highly similar)          | %    | Acc. No.                    | Acc. No. isolates        |
|-----------|----------------|------------------|-------------|------------------------------------------------------|------|-----------------------------|----------------------------------------------------|------|-----------------------------|--------------------------|
| SU122     | Outer umbrella | MB               | 764         | <i>Bizionia</i> sp. strain SER20                     | 100  | <a href="#">MK660308.1</a>  | <i>Bizionia berychis</i> strain RA3-3-1            | 100  | <a href="#">NR_163629.1</a> | <a href="#">OQ259915</a> |
|           |                |                  |             | <i>Bizionia berychis</i> strain RA3-3-1              | 100  | <a href="#">NR_163629.1</a> | <i>Bizionia fulviae</i> strain EM7                 | 98.4 | <a href="#">NR_137258.1</a> |                          |
|           |                |                  |             | <i>Bizionia</i> sp. BS-22B                           | 99.9 | <a href="#">KX000020.1</a>  | <i>Bizionia paragorgiae</i> strain KMM 6029        | 96.9 | <a href="#">NR_025827.1</a> |                          |
| SU123     | Outer umbrella | MB               | 728         | <i>Psychrobacter</i> sp. BM06                        | 99.6 | <a href="#">KP172202.1</a>  | <i>Psychrobacter arcticus</i> strain 273-4         | 99.0 | <a href="#">NR_075054.1</a> | <a href="#">OQ259916</a> |
|           |                |                  |             | <i>Psychrobacter</i> sp. strain SXS3-2               | 99.2 | <a href="#">MG383483.1</a>  | <i>Psychrobacter glacincola</i> DSM 12194          | 99.0 | <a href="#">NR_042076.1</a> |                          |
|           |                |                  |             | <i>Psychrobacter glacincola</i> CsDWF-377            | 99.0 | <a href="#">MT415118.1</a>  | <i>Psychrobacter cryohalolentis</i> K5             | 98.8 | <a href="#">NR_075055.1</a> |                          |
| SU124     | Outer umbrella | MB               | 913         | <i>Polaribacter atrinae</i> strain BM-5              | 99.9 | <a href="#">MH550132.1</a>  | <i>Polaribacter atrinae</i> strain WP25            | 99.9 | <a href="#">NR_133820.1</a> | <a href="#">OQ259917</a> |
|           |                |                  |             | <i>Polaribacter atrinae</i> strain WP25              | 99.9 | <a href="#">NR_133820.1</a> | <i>Polaribacter sejongensis</i> KOPRI 21160        | 98.8 | <a href="#">NR_109324.1</a> |                          |
|           |                |                  |             | <i>Polaribacter</i> sp. KJF13-4                      | 99.1 | <a href="#">JQ800223.1</a>  | <i>Polaribacter staleyi</i> strain 10Alg 139       | 98.0 | <a href="#">NR_159336.1</a> |                          |
| SU125     | Outer umbrella | MB               | 849         | <i>Leifsonia</i> sp. W3                              | 100  | <a href="#">FJ424506.1</a>  | <i>Salinibacterium amurskyense</i> KMM 3673        | 99.4 | <a href="#">NR_041932.1</a> | <a href="#">OQ259918</a> |
|           |                |                  |             | <i>Leifsonia</i> sp. C6                              | 100  | <a href="#">FJ539111.1</a>  | <i>Salinibacterium amurskyense</i> KCTC 9931       | 99.4 | <a href="#">MT759917.1</a>  |                          |
|           |                |                  |             | <i>Salinibacterium</i> sp. strain 1664               | 99.9 | <a href="#">FJ539111.1</a>  | <i>Leifsonia rubra</i> strain CMS 76R              | 97.6 | <a href="#">MW228823.1</a>  |                          |
| SU126     | Outer umbrella | MB               | 770         | <i>Shewanella</i> sp. HM13                           | 100  | <a href="#">LC461000.1</a>  | <i>Shewanella livingstonensis</i> strain LMG 19866 | 100  | <a href="#">CP034015.1</a>  | <a href="#">OQ259919</a> |
|           |                |                  |             | <i>Shewanella</i> sp. strain Arc7-138                | 100  | <a href="#">MN784327.1</a>  | <i>Shewanella vesiculosa</i> strain M7             | 100  | <a href="#">NR_042710.1</a> |                          |
|           |                |                  |             | <i>Shewanella livingstonensis</i> LMG 19866          | 100  | <a href="#">MK131328.1</a>  | <i>Shewanella livingstonensis</i> strain NF22      | 99.9 | <a href="#">NR_025443.1</a> |                          |
| SU127     | Outer umbrella | MB               | 996         | <i>Pseudoalteromonas</i> sp. strain L13              | 100  | <a href="#">MN889155.1</a>  | <i>Pseudoalteromonas tetradonis</i> strain GFC     | 100  | <a href="#">CP011041.1</a>  | <a href="#">OQ259920</a> |
|           |                |                  |             | <i>Pseudoalteromonas</i> sp. strain H34              | 100  | <a href="#">MN889141.1</a>  | <i>Pseudoalteromonas issachenkonii</i> KCTC 12958  | 99.9 | <a href="#">CP013350.1</a>  |                          |
|           |                |                  |             | <i>Pseudoalteromonas undina</i> strain W14           | 100  | <a href="#">MN746144.1</a>  | <i>Pseudoalteromonas spiralis</i> strain Te-2-2    | 99.8 | <a href="#">NR_114801.1</a> |                          |
| SU128     | Outer umbrella | MB               | 704         | <i>Psychrobacter</i> sp. strain UP                   | 100  | <a href="#">MN420817.1</a>  | <i>Psychrobacter fjordensis</i> strain BSw21516B   | 99.3 | <a href="#">NR_148330.1</a> | <a href="#">OQ259921</a> |
|           |                |                  |             | <i>Psychrobacter fozii</i> strain D4037              | 100  | <a href="#">FJ161263.1</a>  | <i>Psychrobacter fozii</i> strain NF23             | 99.3 | <a href="#">NR_025531.1</a> |                          |
|           |                |                  |             | <i>Psychrobacter</i> sp. KJF3-37                     | 99.9 | <a href="#">JQ800055.1</a>  | <i>Psychrobacter aquimaris</i> strain SW-210       | 99.0 | <a href="#">NR_113805.1</a> |                          |
| SU129     | Outer umbrella | HS               | 908         | <i>Vibrio</i> sp. strain Arc7-210                    | 100  | <a href="#">MN784332.1</a>  | <i>Vibrio kanaloae</i> strain LMG 20539            | 99.9 | <a href="#">NR_042468.1</a> | <a href="#">OQ259922</a> |
|           |                |                  |             | <i>Vibrio alginolyticus</i> strain K08M4             | 100  | <a href="#">CP017916.1</a>  | <i>Vibrio lentus</i> strain CIP 107166             | 99.9 | <a href="#">NR_114982.1</a> |                          |
|           |                |                  |             | <i>Vibrio atlanticus</i> strain LGP32                | 100  | <a href="#">FM954972.2</a>  | <i>Vibrio atlanticus</i> strain VB 11.11           | 99.7 | <a href="#">NR_116067.1</a> |                          |
| SU134     | Inner umbrella | MB               | 985         | <i>Polaribacter</i> sp. NF3-11                       | 98.5 | <a href="#">FJ196052.1</a>  | <i>Polaribacter vadi</i> strain LPB0003            | 98.0 | <a href="#">NR_156039.1</a> | <a href="#">OQ259923</a> |
|           |                |                  |             | <i>Polaribacter</i> sp. BSw21683                     | 98.4 | <a href="#">JQ069958.1</a>  | <i>Polaribacter undariae</i> strain W-BA7          | 98.0 | <a href="#">KM458974.1</a>  |                          |
|           |                |                  |             | <i>Polaribacter glomeratus</i> strain KOPRI_22229    | 98.4 | <a href="#">EU000227.1</a>  | <i>Polaribacter sejongensis</i> strain KOPRI 21160 | 98.0 | <a href="#">NR_109324.1</a> |                          |
| SU135     | Inner umbrella | MB               | 765         | <i>Pseudoalteromonas neustonica</i> strain CeD-1     | 100  | <a href="#">MN220612.1</a>  | <i>Pseudoalteromonas neustonica</i> PAMC 28425     | 99.0 | <a href="#">NR_151996.1</a> | <a href="#">OQ259924</a> |
|           |                |                  |             | <i>Pseudoalteromonas neustonica</i> SJOD-M-26        | 100  | <a href="#">MK955337.1</a>  | <i>Pseudoalteromonas prydzensis</i> MB8-11         | 98.7 | <a href="#">NR_044803.1</a> |                          |
|           |                |                  |             | <i>Pseudoalteromonas</i> sp. strain DZ-01-10-aga     | 100  | <a href="#">MK577318.1</a>  | <i>Pseudoalteromonas mariniglutinosa</i> KMM 3635  | 97.9 | <a href="#">NR_028992.1</a> |                          |
| SU136     | Inner umbrella | MB               | 834         | <i>Vibrio splendidus</i> strain BST398               | 100  | <a href="#">CP031055.1</a>  | <i>Vibrio lentus</i> strain CIP 107166             | 100  | <a href="#">NR_114982.1</a> | <a href="#">OQ259925</a> |
|           |                |                  |             | <i>Vibrio</i> sp. strain NFH.MB010                   | 100  | <a href="#">MG788349.1</a>  | <i>Vibrio lentus</i> strain 4OM4T                  | 99.9 | <a href="#">NR_028926.1</a> |                          |
|           |                |                  |             | <i>Vibrio</i> sp. hMe27-21                           | 100  | <a href="#">KX453258.1</a>  | <i>Vibrio kanaloae</i> strain LMG 20539            | 99.8 | <a href="#">NR_042468.1</a> |                          |
| SU137     | Inner umbrella | MB               | 757         | <i>Psychrobacter</i> sp. strain BH36                 | 100  | <a href="#">MN049674.1</a>  | <i>Psychrobacter nivimaris</i> strain 88/2-7       | 100  | <a href="#">NR_028948.1</a> | <a href="#">OQ259926</a> |
|           |                |                  |             | <i>Psychrobacter</i> sp. strain GS3                  | 100  | <a href="#">MN421797.1</a>  | <i>Psychrobacter adeliensis</i> strain DSM 15333   | 99.7 | <a href="#">NR_117632.1</a> |                          |
|           |                |                  |             | <i>Psychrobacter nivimaris</i> strain 20_KNBR_Sed_R2 | 100  | <a href="#">MN080178.1</a>  | <i>Psychrobacter adeliensis</i> strain SJ 14       | 99.7 | <a href="#">NR_104882.1</a> |                          |



|       |                |     |      |                                             |      |                            |                                             |      |                             |                          |
|-------|----------------|-----|------|---------------------------------------------|------|----------------------------|---------------------------------------------|------|-----------------------------|--------------------------|
| SU139 | Inner umbrella | HS  | 768  | AliiVibrio sp. strain EL58                  | 100  | <a href="#">MF461376.1</a> | AliiVibrio logei, strain 584                | 99.6 | <a href="#">LR813682.1</a>  | <a href="#">OQ259927</a> |
|       |                |     |      | AliiVibrio sp. H1309/4.1                    | 100  | <a href="#">LN871555.1</a> | AliiVibrio salmonicida strain NCIMB 2262    | 99.6 | <a href="#">NR_116259.1</a> |                          |
|       |                |     |      | AliiVibrio fischeri, strain: CG2            | 100  | <a href="#">AB819695.1</a> | AliiVibrio logei strain NCIMB 2252          | 99.6 | <a href="#">NR_116258.1</a> |                          |
| SU140 | Inner umbrella | HS  | 756  | Pseudoalteromonas sp. strain W11            | 100  | <a href="#">MN889233.1</a> | Pseudoalteromonas arctica A 37-1-2          | 100  | <a href="#">CP011026.1</a>  | <a href="#">OQ259928</a> |
|       |                |     |      | Pseudoalteromonas sp. strain S49            | 100  | <a href="#">MN889221.1</a> | Pseudoalteromonas nigrifaciens NBRC 103036  | 100  | <a href="#">NR_114188.1</a> |                          |
|       |                |     |      | Pseudoalteromonas nigrifaciens strain CeD-2 | 100  | <a href="#">MN220613.1</a> | Pseudoalteromonas paragorgicola KMM 3548    | 100  | <a href="#">NR_025654.1</a> |                          |
| SU143 | Inner umbrella | WSP | 1003 | Psychrobacter sp. P11G5                     | 100  | <a href="#">CP012533.1</a> | Psychrobacter adeliensis strain DSM 15333   | 98.8 | <a href="#">NR_117634.1</a> | <a href="#">OQ259929</a> |
|       |                |     |      | Psychrobacter glacincola: NBRC 101053       | 100  | <a href="#">AB681354.1</a> | Psychrobacter glacincola strain DSM 12194   | 98.6 | <a href="#">NR_042076.1</a> |                          |
|       |                |     |      | Psychrobacter alimentarius strain 1.27      | 99.8 | <a href="#">KX417122.1</a> | Psychrobacter namhaensis strain SW-242      | 98.7 | <a href="#">NR_043141.1</a> |                          |
| SU147 | Inner umbrella | WSP | 835  | Shewanella sp. HM13                         | 100  | <a href="#">LC461000.1</a> | Shewanella livingstonensis strain LMG 19866 | 100  | <a href="#">CP034015.1</a>  | <a href="#">OQ259930</a> |
|       |                |     |      | Shewanella livingstonensis LMG 19866        | 100  | <a href="#">MK131328.1</a> | Shewanella vesiculosa strain M7             | 100  | <a href="#">NR_042710.1</a> |                          |
|       |                |     |      | Shewanella sp. H2-63                        | 100  | <a href="#">KM979184.1</a> | Shewanella livingstonensis strain NF22      | 99.9 | <a href="#">NR_025443.1</a> |                          |

**Table S2.** The IC<sub>50</sub> values (in µg/mL) of the 16 bacterial strain extracts against ESKAPE pathogens Efm: *Enterococcus faecium*; MRSA, methicillin-resistant *Staphylococcus aureus* and the fish pathogens Lg: *Lactococcus garviae* and Vi: *Vibrio ichthyenteri*. Positive controls: ampicillin for Efm and Lg, chloramphenicol for MRSA and Vi. n.t: not tested because of the lack of extract. Most potent bioactivities are boldened. Test pathogens and cancer cells which were not susceptible to any of the extracts are not displayed in the table.

| Isolate                                 | Media-regime | Activity against Efm | Activity against MRSA | Activity against Lg | Activity against Vi |
|-----------------------------------------|--------------|----------------------|-----------------------|---------------------|---------------------|
| <b><i>Biziona</i> sp. SU122</b>         | MB-liquid    | 22.3                 | 20.4                  | 57.6                | >100                |
|                                         | MB-solid     | 60.3                 | 27.7                  | >100                | >100                |
|                                         | GYM-liquid   | >100                 | >100                  | >100                | >100                |
|                                         | GYM-solid    | 17.3                 | 17.4                  | 82.7                | >100                |
| <b><i>Psychrobacter</i> sp. SU123</b>   | MB-liquid    | >100                 | 19.6                  | >100                | >100                |
|                                         | MB-solid     | >100                 | 21.9                  | >100                | >100                |
|                                         | GYM-liquid   | >100                 | 26                    | >100                | >100                |
|                                         | GYM-solid    | >100                 | 25.1                  | >100                | >100                |
| <b><i>Polaribacter</i> sp. SU124</b>    | MB-liquid    | 67.3                 | <b>7.3</b>            | >100                | >100                |
|                                         | MB-solid     | >100                 | 20.9                  | >100                | >100                |
|                                         | GYM-liquid   | >100                 | 80.8                  | >100                | >100                |
|                                         | GYM-solid    | >100                 | 23.2                  | >100                | >100                |
| <b><i>Salinibacterium</i> sp. SU125</b> | MB-liquid    | >100                 | >100                  | >100                | >100                |
|                                         | MB-solid     | >100                 | >100                  | >100                | >100                |
|                                         | GYM-liquid   | >100                 | 28                    | >100                | 56.6                |
|                                         | GYM-solid    | >100                 | 66.5                  | >100                | >100                |
| <b><i>Shewanella</i> sp. SU126</b>      | MB-liquid    | 59.9                 | 20.7                  | >100                | >100                |
|                                         | MB-solid     | 18.7                 | <b>8.5</b>            | 53.4                | >100                |
|                                         | GYM-liquid   | >100                 | >100                  | >100                | >100                |
|                                         | GYM-solid    | n.t                  | n.t                   | n.t                 | >100                |

|                                    |            |      |      |      |      |
|------------------------------------|------------|------|------|------|------|
| <i>Pseudoalteromonas</i> sp. SU127 | MB-liquid  | 42.4 | 22.4 | 66.1 | >100 |
|                                    | MB-solid   | 44.7 | 21.8 | 72.9 | >100 |
|                                    | GYM-liquid | 64.6 | 61.7 | >100 | >100 |
|                                    | GYM-solid  | 18.8 | 18.8 | 20.7 | >100 |
| <i>Psychrobacter</i> sp. SU128     | MB-liquid  | 59.2 | 21.3 | 87.4 | >100 |
|                                    | MB-solid   | 79   | 14.6 | >100 | >100 |
|                                    | GYM-liquid | 19.6 | 20.4 | 67.6 | >100 |
|                                    | GYM-solid  | 18.4 | 12.5 | 62.7 | >100 |
| <i>Vibrio</i> sp. SU129            | MB-liquid  | 62   | 65   | >100 | >100 |
|                                    | MB-solid   | >100 | 29.5 | >100 | 91.5 |
|                                    | GYM-liquid | 19.7 | 19.7 | 72.9 | >100 |
|                                    | GYM-solid  | 20.8 | 21.3 | 65   | >100 |
| <i>Polaribacter</i> sp. SU134      | MB-liquid  | >100 | >100 | >100 | >100 |
|                                    | MB-solid   | >100 | >100 | >100 | >100 |
|                                    | GYM-liquid | >100 | >100 | >100 | >100 |
|                                    | GYM-solid  | n.t  | n.t  | n.t  | >100 |
| <i>Pseudoalteromonas</i> sp. SU135 | MB-liquid  | >100 | 62.9 | >100 | >100 |
|                                    | MB-solid   | 92.3 | 26.9 | >100 | >100 |
|                                    | GYM-liquid | 19.2 | 21.4 | 63.1 | >100 |
|                                    | GYM-solid  | 18.8 | 18.3 | 27.2 | >100 |
| <i>Vibrio</i> sp. SU136            | MB-liquid  | 73.7 | 37.9 | >100 | >100 |
|                                    | MB-solid   | >100 | 62   | >100 | >100 |
|                                    | GYM-liquid | >100 | >100 | >100 | >100 |
|                                    | GYM-solid  | n.t  | n.t  | n.t  | >100 |
| <i>Psychrobacter</i> sp. SU137     | MB-liquid  | 37.8 | 21.3 | 69.6 | >100 |
|                                    | MB-solid   | 19.4 | 18.7 | 43.3 | >100 |
|                                    | GYM-liquid | 18.7 | 18.5 | 56.2 | >100 |
|                                    | GYM-solid  | 7.3  | 8.1  | 20.1 | >100 |
| <i>Aliivibrio</i> sp. SU139        | MB-liquid  | >100 | 63.5 | >100 | >100 |
|                                    | MB-solid   | >100 | 82.3 | >100 | >100 |
|                                    | GYM-liquid | >100 | >100 | >100 | >100 |
|                                    | GYM-solid  | n.t  | n.t  | n.t  | >100 |
| <i>Pseudoalteromonas</i> sp. SU140 | MB-liquid  | 57.6 | 20.7 | 65.3 | >100 |
|                                    | MB-solid   | 58.6 | 19.4 | 87.9 | >100 |
|                                    | GYM-liquid | 17.9 | 18.1 | 19.4 | >100 |
|                                    | GYM-solid  | 15.9 | 17.1 | 19.5 | >100 |
| <i>Psychrobacter</i> sp. SU143     | MB-liquid  | >100 | 20.9 | >100 | >100 |
|                                    | MB-solid   | >100 | 25.7 | >100 | >100 |

|                             |            |      |            |      |      |
|-----------------------------|------------|------|------------|------|------|
|                             | GYM-liquid | 20.5 | 20.2       | >100 | >100 |
|                             | GYM-solid  | 39.6 | <b>9.9</b> | >100 | >100 |
| <i>Shewanella</i> sp. SU147 | MB-liquid  | 58.5 | 42.9       | 66.9 | >100 |
|                             | MB-solid   | 19.1 | 16.2       | 45.7 | >100 |
|                             | GYM-liquid | 17.6 | 19.4       | 20.2 | >100 |
|                             | GYM-solid  | 17.8 | 18.9       | 21.9 | >100 |
| <b>Positive control</b>     |            | 1.6  | 3.1        | 0.5  | 0.4  |

**Table S3.** Putative annotation of metabolites produced by the SU143, SU137, SU126 and SU124 in the liquid and solid regime of MB and GYM media. Annotation was based on the  $m/z$   $[M+H]^+$  or other adducts, retention time ( $t_R$ ), predicted molecular formula, fragmentation pattern and source of the hit. The source of the ion is indicated by the peak area (PkArea) recorded. Confidence level of annotation are given based on the reporting standards (1- 4) proposed by Sumner, *et al.* [1] where 1 is identified compound, 2 is putative annotation without reference standards, 3 is putative characterized compound class, and 4 is unknown compound.

| Adduct                         | parent mass | RTMean | MS <sup>2</sup>                             | Mol form.                                                     | Hit                                     | Class      | PkArea GYM-liquid | PkArea GYM-solid | PkArea MB-liquid | PkArea MB-solid | Confidence/reference |
|--------------------------------|-------------|--------|---------------------------------------------|---------------------------------------------------------------|-----------------------------------------|------------|-------------------|------------------|------------------|-----------------|----------------------|
| <i>Psychrobacter</i> sp. SU143 |             |        |                                             |                                                               |                                         |            |                   |                  |                  |                 |                      |
| $[M+Na]^+$                     | 511.2096    | 10.5   | 414; 391; 367                               | C <sub>30</sub> H <sub>32</sub> O <sub>6</sub>                | -                                       | -          | 0                 | 0                | 5386             | 0               | 4                    |
| $[M+H]^+$                      | 355.4134    | 8.4    | 337; 319; 213                               | C <sub>23</sub> H <sub>46</sub> O <sub>2</sub>                | -                                       | Bile acid  | 0                 | 0                | 3790             | 0               | 3 [2]                |
| $[M+H]^+$                      | 311.2583    | 7.9    | 297; 149; 135; 121                          | C <sub>19</sub> H <sub>34</sub> O <sub>3</sub>                | methyl 15-hydroxyoctadeca-9,12-dienoate | fatty acid | 0                 | 0                | 0                | 7374            | 3 [3]                |
| $[M+K]^+$                      | 429.2299    | 8.4    | 411; 355; 337                               | C <sub>24</sub> H <sub>39</sub> O <sub>4</sub>                | 12-hydroxy-3-ketocholanic acid          | Bile acid  | 0                 | 0                | 7852             | 0               | 2 [2]                |
| $[M+Na]^+$                     | 1021.919    | 10.5   | 883; 797; 711; 625; 539; 453; 367; 281; 195 | C <sub>67</sub> H <sub>120</sub> O <sub>6</sub>               | -                                       | PHB        | 0                 | 0                | 4681             | 0               | 3                    |
| $[M+H]^+$                      | 355.4781    | 8.4    | 337; 319; 213                               | -                                                             | -                                       | Bile acid  | 0                 | 0                | 4991             | 0               | 3                    |
| $[M+H]^+$                      | 480.3093    | 9.1    | 339; 308; 155; 135                          | C <sub>23</sub> H <sub>47</sub> NO <sub>7</sub> P             | PE (18:1/0:0)                           | lipids     | 7727              | 7946             | 23769            | 229952          | 3 [4]                |
| $[M+Na]^+$                     | 849.8456    | 10.1   | 797; 711; 625; 539; 453; 367; 281; 195      | C <sub>55</sub> H <sub>108</sub> O <sub>5</sub>               | -                                       | PHB        | 0                 | 0                | 0                | 3516            | 3                    |
| $[M+H]^+$                      | 220.12      | 3.9    | 164; 152; 141                               | C <sub>12</sub> H <sub>15</sub> N <sub>2</sub> O <sub>2</sub> | -                                       |            | 0                 | 0                | 10835            | 3915            | 3                    |
| $[M-2H_2O+H]^+$                | 357.2756    | 8.3    | 338; 247; 215; 161                          | C <sub>24</sub> H <sub>36</sub> O <sub>2</sub>                | 3,12-dihydroxycholanolic acid           | Bile acid  | 0                 | 0                | 33381            | 17997           | 2 [2]                |
| $[M+H]^+$                      | 373.5783    | 8.4    | 355; 337; 213                               | -                                                             | -                                       | Bile acid  | 0                 | 0                | 1077             | 0               | 3                    |
| $[M+Na]^+$                     | 942.3873    | 10.5   | 625; 539; 453; 367; 295; 281; 195           | C <sub>48</sub> H <sub>61</sub> O <sub>19</sub>               | -                                       | PHB        | 0                 | 0                | 0                | 2229            | 3                    |

|                                     |          |      |                                                  |                                                               |                                                                                                         |                       |       |       |       |        |         |
|-------------------------------------|----------|------|--------------------------------------------------|---------------------------------------------------------------|---------------------------------------------------------------------------------------------------------|-----------------------|-------|-------|-------|--------|---------|
| [M+H] <sup>+</sup>                  | 778.5354 | 11.1 | 595; 573; 184; 146                               | C <sub>44</sub> H <sub>76</sub> NO <sub>8</sub> P             | 1,2-Di-(9Z,12Z,15Z-octadecatrienoyl)-sn-glycero-3-phosphocholine                                        | lipids                | 5910  | 0     | 0     | 0      | 3 [5]   |
| [M+H] <sup>+</sup>                  | 480.3092 | 8.9  | 339; 308; 135; 121                               | C <sub>23</sub> H <sub>46</sub> NO <sub>7</sub> P             | PE (18:1/0:0)                                                                                           | lipids                | 16667 | 23682 | 25275 | 202226 | 3 [5]   |
| [M+H] <sup>+</sup>                  | 339.2897 | 8.9  | 301; 265; 247; 149; 135; 121                     | C <sub>21</sub> H <sub>38</sub> O <sub>3</sub>                | methyl 3-hydroxyicos-11,14-dienoate                                                                     | fatty acid            | 6737  | 10008 | 10780 | 127311 | 3 [3]   |
| [M+H] <sup>+</sup>                  | 482.3243 | 9.8  | 367; 341; 310; 155                               | C <sub>23</sub> H <sub>49</sub> NO <sub>7</sub> P             | PE (18:0/0:0)                                                                                           | lipids                | 0     | 0     | 0     | 6207   | 3 [4,5] |
| [M+H] <sup>+</sup>                  | 959.6099 | 9.1  | 339; 308; 265                                    | -                                                             | PE                                                                                                      | lipids                | 0     | 0     | 0     | 9572   | 3       |
| [M+Na] <sup>+</sup>                 | 1159.479 | 8.9  | 883; 797; 711; 625; 539; 453; 367; 281; 195      | C <sub>72</sub> H <sub>70</sub> O <sub>14</sub>               | -                                                                                                       | PHB                   | 0     | 0     | 0     | 33812  | 3 [6]   |
| [M+H-H <sub>2</sub> O] <sup>+</sup> | 339.2896 | 9.1  | 301; 265; 135; 121;                              | C <sub>21</sub> H <sub>38</sub> O <sub>3</sub>                | Monoelaidin (2,3-dihydroxypropyl (E)-octadec-9-enoate)                                                  | fatty acid            | 948   | 0     | 0     | 65456  | 3 [7]   |
| [M+Na] <sup>+</sup>                 | 849.3435 | 10.1 | 797; 711; 625; 539; 453; 367; 281; 195           | C <sub>47</sub> H <sub>54</sub> O <sub>13</sub>               | -                                                                                                       | PHB                   | 0     | 0     | 0     | 4258   | 3       |
| [M+H] <sup>+</sup>                  | 639.5307 | 10.1 | 448; 381; 364; 345; 318; 115; 70                 | C <sub>37</sub> H <sub>70</sub> N <sub>2</sub> O <sub>6</sub> | -                                                                                                       | ornithine lipids (OL) | 7939  | 0     | 0     | 0      | 3 [8]   |
| [M+H] <sup>+</sup>                  | 466.2926 | 8.4  | 325; 294; 251; 233; 135; 121                     | C <sub>22</sub> H <sub>44</sub> NO <sub>7</sub> P             | lysophosphatidylcholine (14:1/0:0)                                                                      | lipids                | 3117  | 0     | 2249  | 20908  | 3 [5]   |
| [M+H] <sup>+</sup>                  | 480.4825 | 9.1  | 339; 308; 135; 121                               | -                                                             | PE                                                                                                      | lipids                | 0     | 0     | 0     | 3472   | 3       |
| [M+H] <sup>+</sup>                  | 452.2774 | 8.1  | 311; 280; 237; 219; 135; 121                     | C <sub>21</sub> H <sub>42</sub> NO <sub>7</sub> P             | PE(16:1/0:0)(lysophosphatidylethanolamine                                                               | lipids                | 0     | 0     | 0     | 46551  | 3 [9]   |
| [M+H] <sup>+</sup>                  | 268.2642 | 10.7 | 251; 233; 149; 135                               | C <sub>17</sub> H <sub>33</sub> NO                            | -                                                                                                       | fatty acid            | 5452  | 0     | 0     | 0      | 3       |
| [M+H] <sup>+</sup>                  | 466.2924 | 8.6  | 325; 294; 251; 233; 135; 121                     | C <sub>22</sub> H <sub>44</sub> NO <sub>7</sub> P             | lysophosphatidylcholine (14:1/0:0)                                                                      | lipids                | 0     | 0     | 0     | 27752  | 3 [10]  |
| [M+Na] <sup>+</sup>                 | 643.2577 | 6.9  | 557; 539; 471; 453; 385; 367; 299; 281; 213; 195 | C <sub>28</sub> H <sub>44</sub> O <sub>15</sub>               | 27-Hydroxy-3,7,11,15,19,23-hexamethyl-5,9,13,17,21,25-hexaoxo-4,8,12,16,20,24-hexaoxaooctacosanoic acid | PHB                   | 0     | 0     | 10183 | 13347  | 3 [11]  |
| [M+H] <sup>+</sup>                  | 373.6283 | 8.4  | 355; 213; 199                                    | -                                                             | -                                                                                                       | Bile acid             | 0     | 0     | 1433  | 0      | 3       |
| [M+Na] <sup>+</sup>                 | 711.284  | 8.4  | 625; 539; 453; 367; 281; 195                     | C <sub>32</sub> H <sub>48</sub> O <sub>16</sub>               | (4,8,12,16,20,24,28,32)-4,8,12,16,20,24,28,32-Octamethyl-                                               | PHB                   | 0     | 0     | 8446  | 0      | 3 [11]  |

|                                      |          |      |                                        |                                                               |                                                                            |                       |       |       |        |        |       |
|--------------------------------------|----------|------|----------------------------------------|---------------------------------------------------------------|----------------------------------------------------------------------------|-----------------------|-------|-------|--------|--------|-------|
|                                      |          |      |                                        |                                                               | 1,5,9,13,17,21,25,29-octaoxacyclodotriacotane-2,6,10,14,18,22,26,30-octone |                       |       |       |        |        |       |
| [M+H] <sup>+</sup>                   | 641.5468 | 10.5 | 383; 366; 347; 319; 115; 70            | C <sub>37</sub> H <sub>72</sub> N <sub>2</sub> O <sub>6</sub> | -                                                                          | ornithine lipids (OL) | 21736 | 0     | 0      | 0      | 3 [5] |
| [M+H] <sup>+</sup>                   | 373.4876 | 8.4  |                                        |                                                               |                                                                            | Bile acid             | 0     | 0     | 1531   | 0      | 3     |
| [M+H] <sup>+</sup>                   | 452.2771 | 7.9  | 311; 280; 237; 155                     | C <sub>21</sub> H <sub>42</sub> NO <sub>7</sub> P             | PE(16:1/0:0)                                                               | lipids                | 0     | 0     | 0      | 19467  | 3 [9] |
| [M+H] <sup>+</sup>                   | 337.3976 | 8.4  | 319; 279; 267; 213; 159                | C <sub>24</sub> H <sub>32</sub> O                             | -                                                                          | Bile acid             | 0     | 0     | 998    | 0      | 3     |
| [M+H] <sup>+</sup>                   | 370.2743 | 6.0  | 353; 335; 317; 227                     | C <sub>24</sub> H <sub>35</sub> NO <sub>2</sub>               | -                                                                          | Bile acid             | 0     | 0     | 45902  | 29963  | 3     |
| [M+H-2H <sub>2</sub> O] <sup>+</sup> | 237.222  | 11.1 | 219; 200; 177; 163; 149; 135; 121; 95  | C <sub>16</sub> H <sub>32</sub> O <sub>3</sub>                | 3-Hydroxyhexadecanoic acid                                                 | fatty acid            | 22770 | 16833 | 10762  | 9380   | 3 [7] |
| [M+H] <sup>+</sup>                   | 480.597  | 9.1  | 339; 308                               | -                                                             | PE                                                                         | lipids                | 0     | 0     | 0      | 1077   | 3     |
| [M+H] <sup>+</sup>                   | 522.3555 | 9.2  | 184; 124; 104                          | C <sub>26</sub> H <sub>52</sub> NO <sub>7</sub> P             | PC (0:0/18:1)                                                              | lipids                | 1338  | 0     | 7505   | 0      | 3 [5] |
| [M-2H <sub>2</sub> O+H] <sup>+</sup> | 355.5537 | 8.4  | 337; 319; 285; 213                     | C <sub>24</sub> H <sub>34</sub> O <sub>2</sub>                | -                                                                          | Bile acid             | 0     | 0     | 2779   | 0      | 3     |
|                                      | 494.324  | 9.4  | 353; 339                               | C <sub>24</sub> H <sub>48</sub> NO <sub>7</sub> P             | PE(0:0/19:1)                                                               | lipids                | 0     | 0     | 0      | 2679   | 3 [5] |
| [M+NH <sub>3</sub> +H] <sup>+</sup>  | 254.2483 | 10.2 | 237; 219; 135                          | C <sub>16</sub> H <sub>28</sub> O                             | -                                                                          | fatty acid            | 10921 | 0     | 0      | 0      | 3 [3] |
| [M+H] <sup>+</sup>                   | 502.2906 | 8.9  | 459; 361; 339; 164; 120                | C <sub>25</sub> H <sub>46</sub> NO <sub>7</sub> P             | PE (18:1/0:0)                                                              | lipids                | 0     | 0     | 1287   | 17327  | 3 [5] |
| [M+H] <sup>+</sup>                   | 344.2795 | 9.9  | 149; 135; 121                          | C <sub>23</sub> H <sub>36</sub> O <sub>2</sub>                | -                                                                          | fatty acid            | 4898  | 0     | 0      | 0      | 3     |
| [M+H] <sup>+</sup>                   | 372.2896 | 7.3  | 355; 337; 319; 213                     | C <sub>21</sub> H <sub>39</sub> O <sub>5</sub>                | -                                                                          | Bile acid             | 0     | 0     | 30112  | 18341  | 3     |
| [M+Na] <sup>+</sup>                  | 1073.441 | 8.7  | 625; 557; 539; 453; 385; 367; 281; 195 | C <sub>35</sub> H <sub>70</sub> O <sub>20</sub>               | -                                                                          | PHB                   | 0     | 0     | 6834   | 0      | 3     |
| [M+H] <sup>+</sup>                   | 406.2953 | 6.0  | 370; 353; 335; 317; 253                | C <sub>24</sub> H <sub>39</sub> NO <sub>4</sub>               | -                                                                          | Bile acid             | 0     | 0     | 0      | 14641  | 3     |
| [M+H] <sup>+</sup>                   | 482.3243 | 10.0 | 341; 310; 285; 109                     | C <sub>23</sub> H <sub>48</sub> NO <sub>7</sub> P             | PE (18:0/0:0)                                                              | lipids                | 0     | 0     | 0      | 8452   | 3 [5] |
| [M+Na] <sup>+</sup>                  | 502.2907 | 9.1  | 459; 441; 379; 339; 195; 176; 120      | C <sub>23</sub> H <sub>46</sub> NO <sub>7</sub> PN a          | 1-(9Z-Octadecenoyl)-sn-glycero-3-phosphoethanolamine (PE(18:1/0:0))        | lipids                | 0     | 0     | 0      | 17426  | 3 [5] |
| [M+Na] <sup>+</sup>                  | 942.8887 | 10.5 | 639; 625; 539; 453; 367; 281; 195      | -                                                             | -                                                                          | PHB                   | 0     | 0     | 0      | 2157   | 3     |
| [2M+H] <sup>+</sup>                  | 781.5638 | 8.4  | 373; 355; 337; 319                     | C <sub>24</sub> H <sub>38</sub> O <sub>4</sub>                | 12-hydroxy-3-ketochalanic acid                                             | Bile acid             | 0     | 0     | 146698 | 111170 | 3 [2] |
| [M+H] <sup>+</sup>                   | 457.2028 | 9.0  | 441; 379; 339; 195; 176                | C <sub>25</sub> H <sub>32</sub> NO <sub>5</sub> P             | PE                                                                         | lipids                | 0     | 0     | 0      | 3304   | 3     |

|                                       |          |      |                                             |                                                               |                                                                                                                                              |                  |       |       |        |        |        |
|---------------------------------------|----------|------|---------------------------------------------|---------------------------------------------------------------|----------------------------------------------------------------------------------------------------------------------------------------------|------------------|-------|-------|--------|--------|--------|
| [M+H] <sup>+</sup>                    | 459.2478 | 9.1  | 441; 379; 339; 308; 195; 155                | C <sub>22</sub> H <sub>38</sub> NO <sub>7</sub> P             | PE                                                                                                                                           | lipids           | 0     | 0     | 0      | 5061   | 3      |
| [M-H <sub>2</sub> O+H] <sup>+</sup>   | 373.5322 | 8.4  | 355; 337; 319; 213                          | C <sub>24</sub> H <sub>38</sub> O <sub>4</sub>                | 12-hydroxy-3-ketocholanic acid                                                                                                               | Bile acid        | 0     | 0     | 926    | 0      | 3 [2]  |
| [M+H] <sup>+</sup>                    | 205.0977 | 2.8  | 177; 132; 120                               | C <sub>11</sub> H <sub>12</sub> N <sub>2</sub> O <sub>2</sub> | cyclo-(glycyl-L-phenylalanine)                                                                                                               | diketopiperazine | 0     | 0     | 8194   | 0      | 3 [12] |
| [M-H] <sup>+</sup>                    | 398.2695 | 8.4  | 371; 345; 343; 327; 311                     | C <sub>24</sub> H <sub>38</sub> O <sub>4</sub>                | 12-hydroxy-3-ketocholanic acid                                                                                                               | Bile acid        | 0     | 0     | 272850 | 212998 | 3 [2]  |
|                                       |          |      |                                             |                                                               |                                                                                                                                              |                  |       |       |        |        |        |
|                                       |          |      |                                             |                                                               |                                                                                                                                              |                  |       |       |        |        |        |
| <b><i>Psychrobacter</i> sp. SU137</b> |          |      |                                             |                                                               |                                                                                                                                              |                  |       |       |        |        |        |
| [2M+H] <sup>+</sup>                   | 781.7834 | 8.4  |                                             | C <sub>24</sub> H <sub>38</sub> O <sub>4</sub>                | 12-Hydrox-3-ketocholanic acid                                                                                                                | Bile acid        | 0     | 0     | 3090   | 0      | 3 [2]  |
| [2M+H] <sup>+</sup>                   | 785.5936 | 8.1  | 357; 339; 321                               | C <sub>24</sub> H <sub>40</sub> O <sub>4</sub>                | 3,12-Dihydroxycholanic acid                                                                                                                  | Bile acid        | 0     | 0     | 11284  | 0      | 3 [2]  |
| [M+H] <sup>+</sup>                    | 480.3089 | 9.1  | 339; 308                                    | C <sub>25</sub> H <sub>46</sub> NO <sub>7</sub> P             | PE (18:1/0:0)                                                                                                                                | lipids           | 15885 | 1325  | 1611   | 0      | 3 [5]  |
| [M-2H <sub>2</sub> O+H] <sup>+</sup>  | 355.4796 | 8.4  | 337; 319; 285; 213                          | -                                                             | -                                                                                                                                            | Bile acid        | 0     | 0     | 7991   | 0      | 3      |
| [M+Na] <sup>+</sup>                   | 1101.473 | 9.7  | 567; 539; 481; 453; 395; 367; 309; 281; 195 | C <sub>57</sub> H <sub>74</sub> O <sub>20</sub>               | -                                                                                                                                            | PHB              | 0     | 61393 | 0      | 0      | 3      |
| [M+H] <sup>+</sup>                    | 778.5365 | 10.7 | 595; 573; 184; 146                          | C <sub>44</sub> H <sub>76</sub> NO <sub>8</sub> P             | 1,2-Di-(9Z,12Z,15Z-octadecatrienoyl)-sn-glycero-3-phosphocholine                                                                             | lipid            | 1498  | 0     | 0      | 0      | 3 [5]  |
| [M+Na] <sup>+</sup>                   | 863.8612 | 10.8 | 797; 625; 539; 453; 367; 281; 195           | -                                                             | -                                                                                                                                            | PHB              | 0     | 9031  | 0      | 0      | 3      |
| [M+Na] <sup>+</sup>                   | 777.8243 | 10.6 | 625; 539; 453; 367; 281; 195                | -                                                             | -                                                                                                                                            | PHB              | 0     | 11331 | 0      | 0      | 3      |
| [M+Na] <sup>+</sup>                   | 820.8437 | 10.7 | 711; 625; 539; 453; 367; 309; 281; 195      | -                                                             | -                                                                                                                                            | PHB              | 0     | 18208 | 0      | 0      | 3      |
| [M-2H <sub>2</sub> O+H] <sup>+</sup>  | 430.2952 | 7.2  | 412; 355 337; 319; 213                      | C <sub>26</sub> H <sub>42</sub> NO <sub>6</sub>               | "((4R)-4-((3R,5S,6R,7S,9S,10R,13R,14S,17R)-3,6,7-trihydroxy-10,13-dimethylhexadecahydro-1H-cyclopenta[a]phenanthren-17-yl)pentanoyl)glycine" | Bile acid        | 0     | 0     | 0      | 89002  | 3 [7]  |
| [M-2H <sub>2</sub> O+H] <sup>+</sup>  | 355.2632 | 10.8 | 272; 254; 164                               | C <sub>24</sub> H <sub>36</sub> O <sub>4</sub>                | 12-hydroxy-3-ketocholanic acid                                                                                                               | Bile acid        | 0     | 0     | 1390   | 0      | 3 [2]  |
| [2M+K] <sup>+</sup>                   | 818.108  | 6.9  | 355; 337                                    | -                                                             | -                                                                                                                                            | Bile acid        | 0     | 0     | 660    | 0      | 3      |



|                                          |          |      |                                                           |                                                               |                                                                                                                                                                                 |              |   |       |       |        |        |
|------------------------------------------|----------|------|-----------------------------------------------------------|---------------------------------------------------------------|---------------------------------------------------------------------------------------------------------------------------------------------------------------------------------|--------------|---|-------|-------|--------|--------|
| [M+Na] <sup>+</sup>                      | 1055.431 | 10.2 | 969; 883; 797;<br>711; 625; 539;<br>453; 367; 281;<br>195 | C <sub>55</sub> H <sub>68</sub> O <sub>19</sub>               | -                                                                                                                                                                               | PHB          | 0 | 0     | 5626  | 0      | 3      |
| [M-H <sub>2</sub> O+H] <sup>+</sup>      | 389.269  | 7.8  | 353; 325; 307;<br>147                                     | C <sub>24</sub> H <sub>38</sub> O <sub>5</sub>                | dihydroxy-7-<br>ketocholelonic acid                                                                                                                                             | Bile acid    | 0 | 0     | 7878  | 0      | 3 [2]  |
| [M+Na] <sup>+</sup>                      | 969.3945 | 10.0 | 883; 797; 711;<br>625; 539; 453;<br>367; 281; 195         | C <sub>47</sub> H <sub>62</sub> O <sub>20</sub>               | -                                                                                                                                                                               | PHB          | 0 | 0     | 19654 | 0      | 3      |
| [M+H] <sup>+</sup>                       | 408.3111 | 8.4  | -                                                         | C <sub>24</sub> H <sub>41</sub> NO <sub>4</sub>               | -                                                                                                                                                                               | Bile acid    | 0 | 0     | 4615  | 4740   | 3      |
| [M+Na] <sup>+</sup>                      | 453.1734 | 7.8  | 367; 281; 195                                             | C <sub>20</sub> H <sub>30</sub> O <sub>10</sub>               | pentolide<br>(pentaoxacycloeicosa<br>nepentone<br>pentamethyl)                                                                                                                  | PHB          | 0 | 42685 | 0     | 8166   | 2 [13] |
| [M+Na] <sup>+</sup>                      | 383.1615 | 4.7  | 365; 309; 253                                             | C <sub>19</sub> H <sub>24</sub> N <sub>2</sub> O <sub>5</sub> | -                                                                                                                                                                               | -            | 0 | 0     | 18437 | 0      | 3      |
| [M+Na] <sup>+</sup>                      | 501.304  | 8.8  | 444; 339; 299                                             | C <sub>24</sub> H <sub>46</sub> O <sub>5</sub>                | -                                                                                                                                                                               | PHB          | 0 | 0     | 0     | 11713  | 3      |
| [M+H] <sup>+</sup>                       | 535.3355 | 11.1 | 165                                                       | C <sub>32</sub> H <sub>48</sub> O <sub>5</sub>                | -                                                                                                                                                                               | -            | 0 | 0     | 0     | 7742   | 3      |
| [M+H] <sup>+</sup>                       | 367.1371 | 8.6  | 227; 213; 145                                             | -                                                             | -                                                                                                                                                                               | Bile acid    | 0 | 0     | 4354  | 0      | 3      |
| [M+H] <sup>+</sup>                       | 337.3968 | 8.4  | 319; 267; 213                                             | -                                                             | -                                                                                                                                                                               | Bile acid    | 0 | 0     | 2519  | 0      | 3      |
| [M-<br>2H <sub>2</sub> O+H] <sup>+</sup> | 337.253  | 7.1  | 319; 209; 149                                             | C <sub>24</sub> H <sub>36</sub> O <sub>3</sub>                | -                                                                                                                                                                               | Bile acid    | 0 | 0     | 20058 | 0      | 3      |
| [M+Na] <sup>+</sup>                      | 643.2578 | 6.9  | 539; 471; 453;<br>385; 367; 281;<br>195                   | C <sub>28</sub> H <sub>44</sub> O <sub>15</sub>               | (3,7,11,15,19,23,27)-<br>27-Hydroxy-<br>3,7,11,15,19,23-<br>hexamethyl-<br>5,9,13,17,21,25-<br>hexaoxo-<br>4,8,12,16,20,24-<br>hexaoxaoctacosanoic<br>acid                      | PHB (linear) | 0 | 0     | 17603 | 23999  | 3 [14] |
| [M-<br>2H <sub>2</sub> O+H] <sup>+</sup> | 357.279  | 8.4  | 275; 261; 247;<br>215                                     | C <sub>24</sub> H <sub>38</sub> O <sub>3</sub>                | "(R)-4-<br>((3S,5S,8R,9S,10S,12S<br>,13R,14S,17R)-3,12-<br>dihydroxy-10,13-<br>dimethylhexadecahy-<br>dro-1H-<br>cyclopenta[a]phenan-<br>threne-17-<br>yl)pentanoic acid"       | Bile acid    | 0 | 0     | 42563 | 200354 | 3 [7]  |
| [M+Na] <sup>+</sup>                      | 729.295  | 7.3  | 643; 625; 539;<br>471; 453; 367;<br>281; 195              | C <sub>32</sub> H <sub>50</sub> O <sub>17</sub>               | (3,7,11,15,19,23,27,31-<br>)-31-Hydroxy-<br>3,7,11,15,19,23,27-<br>heptamethyl-<br>5,9,13,17,21,25,29-<br>heptaoxo-<br>4,8,12,16,20,24,28-<br>heptaoxadotriaconta-<br>noic acid | PHB (linear) | 0 | 15501 | 17672 | 0      | 3 [14] |

|                                      |          |     |                                                  |                                                 |                                                                                                                                                  |           |   |       |       |       |        |
|--------------------------------------|----------|-----|--------------------------------------------------|-------------------------------------------------|--------------------------------------------------------------------------------------------------------------------------------------------------|-----------|---|-------|-------|-------|--------|
| [M+H] <sup>+</sup>                   | 426.1863 | 7.0 | 355; 337; 319; 213                               | -                                               | -                                                                                                                                                | Bile acid | 0 | 0     | 21433 | 0     | 3      |
| [M-2H <sub>2</sub> O+H] <sup>+</sup> | 371.2584 | 7.8 |                                                  |                                                 | "(R)-4-((3S,5S,7R,8R,9S,10S,13R,14S,17R)-3,7-dihydroxy-10,13-dimethyl-12-oxohexadecahydro-1H-cyclopenta[a]phenanthren-17-yl)pentanoic acid"      | Bile acid | 0 | 0     | 11892 | 0     | 3      |
| [M-2H <sub>2</sub> O+H] <sup>+</sup> | 355.4122 | 8.4 | 337; 319; 213                                    | -                                               | -                                                                                                                                                | Bile acid | 0 | 0     | 10186 | 0     | 3      |
| [M+Na] <sup>+</sup>                  | 843.363  | 8.9 | 739; 653; 567; 481; 453; 395; 367; 309; 281; 195 | C <sub>38</sub> H <sub>60</sub> O <sub>19</sub> | -                                                                                                                                                | PHB       | 0 | 11458 | 0     | 0     | 3 [14] |
| [M-H <sub>2</sub> O+H] <sup>+</sup>  | 448.3057 | 7.2 | 412; 355; 337; 319; 213                          | C <sub>26</sub> H <sub>43</sub> NO <sub>6</sub> | "((R)-4-((3R,5S,7S,8R,9S,10S,12S,13R,14S,17R)-3,7,12-trihydroxy-10,13-dimethylhexadecahydro-1H-cyclopenta[a]phenanthren-17-yl)pentanoyl)glycine" | Bile acid | 0 | 0     | 0     | 49931 | 3      |
| [M-H <sub>2</sub> O+H] <sup>+</sup>  | 373.1485 | 6.9 | 337; 319; 227; 213; 199                          | -                                               | -                                                                                                                                                | Bile acid | 0 | 0     | 1232  | 845   | 3      |
| [M+Na] <sup>+</sup>                  | 470.2878 | 7.2 | 452; 395                                         | C <sub>26</sub> H <sub>41</sub> NO <sub>5</sub> | 2-(4-(7-hydroxy-9a,11a-dimethyl-4-oxo-hexadecahydro-1H-cyclopenta[a]phenanthren-1-yl)pentanamido)acetic acid                                     | Bile acid | 0 | 0     | 88851 | 43472 | 3      |
| [M-2H <sub>2</sub> O+H] <sup>+</sup> | 415.2851 | 8.1 | 355; 213                                         | C <sub>26</sub> H <sub>42</sub> O <sub>6</sub>  | 4-[7-(acetyloxy)-4,11-dihydroxy-9a,11a-dimethyl-hexadecahydro-1H-cyclopenta[a]phenanthren-1-yl]pentanoic acid                                    | Bile acid | 0 | 0     | 0     | 5490  | 3      |
| [M+H] <sup>+</sup>                   | 426.1855 | 7.2 | 355; 337; 319; 213                               | -                                               | -                                                                                                                                                | Bile acid | 0 | 0     | 6787  | 0     | 3      |

|                                      |          |      |                                                   |                                                   |                                                                                                                                                 |              |   |       |        |       |        |
|--------------------------------------|----------|------|---------------------------------------------------|---------------------------------------------------|-------------------------------------------------------------------------------------------------------------------------------------------------|--------------|---|-------|--------|-------|--------|
| [M+H] <sup>+</sup>                   | 399.2102 | 7.5  | 165                                               | -                                                 | -                                                                                                                                               |              | 0 | 0     | 0      | 19139 | 3      |
| [M+Na] <sup>+</sup>                  | 987.4049 | 8.4  | 797; 711; 625;<br>539; 453; 367;<br>299; 281; 195 |                                                   | -                                                                                                                                               | PHB          | 0 | 14639 | 34413  | 40086 | 3 [14] |
| [M+Na] <sup>+</sup>                  | 711.2843 | 8.4  | 625; 539; 453;<br>367; 281; 195                   | C <sub>32</sub> H <sub>48</sub> O <sub>16</sub>   | (4,8,12,16,20,24,28,32)-<br>4,8,12,16,20,24,28,32-Octamethyl-<br>1,5,9,13,17,21,25,29-octaoxacyclodotriacotane-<br>2,6,10,14,18,22,26,30-octone | PHB          | 0 | 0     | 28729  | 15177 | 3 [14] |
| [M+Na] <sup>+</sup>                  | 625.2478 | 8.5  | 539; 453; 367;<br>281; 195                        | C <sub>28</sub> H <sub>42</sub> O <sub>14</sub>   | heptolide                                                                                                                                       | PHB          | 0 | 17335 | 63424  | 0     | 3      |
| [M+Na] <sup>+</sup>                  | 863.3592 | 10.8 | 739; 711; 625;<br>539; 453; 367;<br>281; 195      | -                                                 | -                                                                                                                                               | PHB          | 0 | 10789 | 0      | 0     | 3      |
| [M+Na] <sup>+</sup>                  | 883.3577 | 9.7  | 797; 711; 625;<br>539; 453; 367;<br>281; 195      | -                                                 | -                                                                                                                                               | PHB          | 0 | 13179 | 15302  | 0     | 3      |
| [M+NH <sub>4</sub> ] <sup>+</sup>    | 468.3325 | 8.1  | 355; 319; 245                                     | C <sub>26</sub> H <sub>42</sub> O <sub>6</sub>    | acetylated cholic acid                                                                                                                          | Bile acid    | 0 | 0     | 8043   | 0     | 2 [7]  |
| [M+Na] <sup>+</sup>                  | 1073.442 | 8.7  | 797; 711; 625;<br>539; 471; 453;<br>367; 281; 195 | -                                                 | -                                                                                                                                               | PHB          | 0 | 0     | 11396  | 0     | 3      |
| [M-H <sub>2</sub> O+H] <sup>+</sup>  | 373.4902 | 8.4  | 355; 337; 319;<br>213                             | -                                                 | -                                                                                                                                               | Bile acid    | 0 | 0     | 2318   | 0     | 3      |
| [M+H] <sup>+</sup>                   | 480.3088 | 8.9  | -                                                 | C <sub>23</sub> H <sub>47</sub> NO <sub>7</sub> P | PE (18:1/0:0)                                                                                                                                   |              | 0 | 4130  | 0      | 0     | 3      |
| [M+Na] <sup>+</sup>                  | 557.2209 | 6.3  | 453; 385; 367;<br>299; 281; 213;<br>195           | C <sub>24</sub> H <sub>38</sub> O <sub>13</sub>   | (3R,7R,11R,15R,19R,23R)-23-Hydroxy-<br>3,7,11,15,19-pentamethyl-<br>5,9,13,17,21-pentaoxo-<br>4,8,12,16,20-pentaoxatetracosanoic acid           | PHB (linear) | 0 | 0     | 58243  | 13729 | 3      |
| [2M+Na] <sup>+</sup>                 | 803.541  | 8.4  |                                                   |                                                   |                                                                                                                                                 | Bile acid    | 0 | 0     | 30723  | 20893 | 3      |
| [M+Na] <sup>+</sup>                  | 797.3203 | 9.4  | 711; 625; 539;<br>453; 367; 281;<br>195           | C <sub>36</sub> H <sub>54</sub> O <sub>18</sub>   | Cyclic PHB:8                                                                                                                                    | PHB          | 0 | 9467  | 0      | 0     | 3 [15] |
| [M+Na] <sup>+</sup>                  | 777.3223 | 10.6 | 625; 539; 453;<br>367; 281; 195                   | C <sub>47</sub> H <sub>58</sub> O <sub>16</sub>   | -                                                                                                                                               | PHB          | 0 | 14488 | 0      | 0     | 3      |
| [M-2H <sub>2</sub> O+H] <sup>+</sup> | 355.5503 | 8.4  | 337; 319; 285;<br>213                             | -                                                 | -                                                                                                                                               | Bile acid    | 0 | 0     | 4055   | 0     | 3      |
| [M-H <sub>2</sub> O+H] <sup>+</sup>  | 373.2753 | 8.4  | 355; 337; 319;<br>213                             | C <sub>24</sub> H <sub>36</sub> O <sub>3</sub>    | 12-hydroxy-3-ketocholanic acid                                                                                                                  | Bile acid    | 0 | 0     | 322629 | 0     | 3 [2]  |

|                                     |          |      |                                                  |                                                               |                                                                                                                                     |           |   |       |        |        |        |
|-------------------------------------|----------|------|--------------------------------------------------|---------------------------------------------------------------|-------------------------------------------------------------------------------------------------------------------------------------|-----------|---|-------|--------|--------|--------|
| [M+Na] <sup>+</sup>                 | 901.3686 | 8.1  | 815; 625; 539; 453; 367; 299; 281; 195           | -                                                             | -                                                                                                                                   | PHB       | 0 | 14437 | 41698  | 0      | 3      |
| [M+Na] <sup>+</sup>                 | 1115.488 | 10.0 | 539; 453; 367; 281; 195                          | C <sub>72</sub> H <sub>70</sub> O <sub>14</sub>               | -                                                                                                                                   | PHB       | 0 | 3110  | 0      | 0      | 3 [6]  |
| [2M+H] <sup>+</sup>                 | 781.5647 | 8.4  | 373; 355; 337; 319                               | C <sub>24</sub> H <sub>38</sub> O <sub>3</sub>                | 12-hydroxy-3-ketocholanic acid                                                                                                      | Bile acid | 0 | 0     | 186649 | 116547 | 3 [2]  |
| [M+H] <sup>+</sup>                  | 479.3083 | 12.1 | 165                                              | C <sub>22</sub> H <sub>38</sub> N <sub>8</sub> O <sub>4</sub> | -                                                                                                                                   | -         | 0 | 0     | 0      | 1205   | 4      |
| [M-H <sub>2</sub> O+H] <sup>+</sup> | 387.2896 | 10.2 | 369; 355; 337; 319; 213                          | C <sub>25</sub> H <sub>40</sub> O <sub>4</sub>                | Methyl 3-oxo-desoxycholate                                                                                                          | Bile acid | 0 | 0     | 26880  | 0      | 3      |
| [M+Na] <sup>+</sup>                 | 539.2107 | 8.1  | 453; 367; 281; 195                               | C <sub>24</sub> H <sub>36</sub> O <sub>12</sub>               | Hexolide                                                                                                                            | PHB       | 0 | 0     | 66179  | 15227  | 2 [16] |
| [M+Na] <sup>+</sup>                 | 413.2668 | 8.1  | 355                                              | C <sub>24</sub> H <sub>38</sub> O <sub>4</sub>                | 12-hydroxy-3-ketocholanic acid                                                                                                      | Bile acid | 0 | 0     | 0      | 6445   | 3 [2]  |
| [M+Na] <sup>+</sup>                 | 467.2725 | 9.3  | 165                                              | C <sub>22</sub> H <sub>40</sub> O <sub>5</sub>                | -                                                                                                                                   | -         | 0 | 0     | 0      | 12988  | 4      |
| [M+Na] <sup>+</sup>                 | 470.2882 | 7.2  | 452; 395                                         | C <sub>26</sub> H <sub>41</sub> NO <sub>5</sub>               | 2-(4-(7-hydroxy-9a,11a-dimethyl-4-oxo-hexadecahydro-1H-cyclopenta[a]phenanthren-1-yl)pentanamido)acetic acid                        | Bile acid | 0 | 0     | 169519 | 0      | 3 [7]  |
| [M+Na] <sup>+</sup>                 | 929.3994 | 9.2  | 739; 653; 567; 481; 453; 367; 309; 281; 195      | C <sub>33</sub> H <sub>62</sub> O <sub>13</sub>               | -                                                                                                                                   | PHB       | 0 | 24804 | 0      | 0      | 3      |
| [M+Na] <sup>+</sup>                 | 820.3415 | 10.7 | 711; 625; 539; 453; 367; 281; 195                | -                                                             | -                                                                                                                                   | PHB       | 0 | 22362 | 0      | 0      | 3      |
| [M+H] <sup>+</sup>                  | 373.4257 | 8.4  | 355; 213; 199                                    | -                                                             | -                                                                                                                                   | Bile acid | 0 | 0     | 4825   | 0      | 3      |
| [M+Na] <sup>+</sup>                 | 1187.51  | 9.9  | 625; 567; 539; 481; 453; 395; 367; 309; 281; 195 | -                                                             | -                                                                                                                                   | PHB       | 0 | 54908 | 0      | 0      | 3      |
| [M+H] <sup>+</sup>                  | 411.2462 | 10.4 | 165                                              | -                                                             | -                                                                                                                                   | -         | 0 | 0     | 0      | 6038   | 3      |
| [M+Na] <sup>+</sup>                 | 711.2845 | 9.1  | 625; 539; 453; 367; 281; 195                     | C <sub>32</sub> H <sub>48</sub> O <sub>16</sub> Na            | (4,8,12,16,20,24,28,32)-4,8,12,16,20,24,28,32-Octamethyl-1,5,9,13,17,21,25,29-octaoxacyclodotriacotane-2,6,10,14,18,22,26,30-octone | PHB       | 0 | 0     | 17084  | 8043   | 3 [11] |
| [M-H <sub>2</sub> O+H] <sup>+</sup> | 357.2796 | 8.3  | 275; 261; 247; 215                               | C <sub>24</sub> H <sub>38</sub> O <sub>3</sub>                | "(R)-4-((5R,8R,9S,10S,13R,14S,17R)-10,13-dimethyl-3-                                                                                | Bile acid | 0 | 0     | 0      | 35811  | 3 [7]  |

|                                      |          |      |                                        |                                                               |                                                                                                                                        |                  |       |        |        |        |        |
|--------------------------------------|----------|------|----------------------------------------|---------------------------------------------------------------|----------------------------------------------------------------------------------------------------------------------------------------|------------------|-------|--------|--------|--------|--------|
|                                      |          |      |                                        |                                                               | oxohexadecahydro-1H-cyclopenta[a]phenanthren-17-yl)pentanoic acid"                                                                     |                  |       |        |        |        |        |
| [M+Na] <sup>+</sup>                  | 815.3313 | 7.7  | 711; 625; 539; 453; 367; 299; 281; 195 | -                                                             | -                                                                                                                                      | PHB              | 0     | 15347  | 6962   | 0      | 3      |
| [M-H] <sup>-</sup>                   | 574.4405 | 11.2 | 350; 333                               | C <sub>32</sub> H <sub>65</sub> NO <sub>5</sub> S             | Sulfobacin B                                                                                                                           | lipids           | 0     | 1677   | 0      | 0      | 3 [17] |
| [M-H] <sup>-</sup>                   | 398.2695 | 8.4  | 371; 345; 343; 327; 311                | C <sub>24</sub> H <sub>38</sub> O <sub>4</sub>                | 12-hydroxy-3-ketocholanic acid                                                                                                         | Bile acid        | 0     | 0      | 180236 | 125290 | 3 [2]  |
|                                      |          |      |                                        |                                                               |                                                                                                                                        |                  |       |        |        |        |        |
|                                      |          |      |                                        |                                                               |                                                                                                                                        |                  |       |        |        |        |        |
| <b>SU124</b>                         |          |      |                                        |                                                               |                                                                                                                                        |                  |       |        |        |        |        |
| [M+H] <sup>+</sup>                   | 387.3221 | 6.6  | 115; 70                                | C <sub>21</sub> H <sub>42</sub> N <sub>2</sub> O <sub>4</sub> | (3-hydroxypentadecanoyl)lysine                                                                                                         | OL               | 6261  | 0      | 6705   | 0      | 3 [18] |
| [M+H] <sup>+</sup>                   | 204.125  | 3.1  | 148; 136                               | C <sub>10</sub> H <sub>13</sub> N <sub>5</sub>                | N6-(Delta2-isopentenyl)-adenine                                                                                                        | purine           | 0     | 22518  | 0      | 2524   | 3 [7]  |
| [M+H] <sup>+</sup>                   | 336.1671 | 3.7  | 204; 148; 136                          | C <sub>15</sub> H <sub>21</sub> N <sub>5</sub> O <sub>4</sub> | N6-Isopentenyladenosine                                                                                                                | purine           | 8217  | 0      | 0      | 0      | 3 [7]  |
| [M+H] <sup>+</sup>                   | 312.2536 | 9.3  | 219; 135; 121                          | -                                                             | -                                                                                                                                      | Fatty acid       | 3536  | 1583   | 0      | 0      | 3      |
| [M-2H <sub>2</sub> O+H] <sup>+</sup> | 357.2796 | 8.3  | 275; 261; 247; 215                     | C <sub>24</sub> H <sub>38</sub> O <sub>3</sub>                | "(R)-4-((3S,5S,8R,9S,10S,12S,13R,14S,17R)-3,12-dihydroxy-10,13-dimethylhexadecahydro-1H-cyclopenta[a]phenanthren-17-yl)pentanoic acid" | Bile acid        | 0     | 0      | 0      | 91143  | 3 [7]  |
| [M-H <sub>2</sub> O-H] <sup>-</sup>  | 237.222  | 10.9 | 219; 135; 121; 107                     | C <sub>16</sub> H <sub>30</sub> O <sub>2</sub>                | Palmitelaidic acid                                                                                                                     | Fatty acid       | 10939 | 10010  | 19190  | 10942  | 3 [7]  |
| [M+H] <sup>+</sup>                   | 312.2909 | 10.4 | 295; 270; 135                          | C <sub>19</sub> H <sub>37</sub> NO <sub>2</sub>               | Gly-C16:1                                                                                                                              | Fatty acid       | 0     | 0      | 95841  | 0      | 3      |
| [M+H] <sup>+</sup>                   | 373.306  | 6.3  | 115; 70                                | C <sub>20</sub> H <sub>40</sub> N <sub>2</sub> O <sub>4</sub> | (3-hydroxytetradecanoyl)lysine                                                                                                         | OL               | 0     | 0      | 28454  | 12372  | 3 [19] |
| [M+H] <sup>+</sup>                   | 387.322  | 6.6  | 115; 70                                | C <sub>21</sub> H <sub>43</sub> N <sub>2</sub> O <sub>4</sub> | (3-hydroxypentadecanoyl)lysine                                                                                                         | OL               | 2689  | 0      | 21613  | 0      | 3 [19] |
| [M+H] <sup>+</sup>                   | 595.5046 | 10.1 | 381; 115; 70                           | C <sub>35</sub> H <sub>66</sub> N <sub>2</sub> O <sub>5</sub> | -                                                                                                                                      | OL               | 13935 | 10267  | 108486 | 0      | 4 [19] |
| [M+H] <sup>+</sup>                   | 211.1453 | 3.6  | 183; 138                               | C <sub>11</sub> H <sub>18</sub> N <sub>2</sub> O <sub>2</sub> | cyclo(proline-leucine)                                                                                                                 | diketopiperazine | 0     | 116989 | 0      | 0      | 2 [12] |

|                                        |             |        |                        |                                                               |                                                                                                                                                             |                  |                   |                  |                 |                        |        |
|----------------------------------------|-------------|--------|------------------------|---------------------------------------------------------------|-------------------------------------------------------------------------------------------------------------------------------------------------------------|------------------|-------------------|------------------|-----------------|------------------------|--------|
| [M-H] <sup>-</sup>                     | 574.4405    | 11.2   | 350; 333               | C <sub>32</sub> H <sub>65</sub> NO <sub>5</sub> S             | Sulfobacin B                                                                                                                                                | lipids           | 0                 | 0                | 7165            | 0                      | 3 [17] |
|                                        |             |        |                        |                                                               |                                                                                                                                                             |                  |                   |                  |                 |                        |        |
|                                        |             |        |                        |                                                               |                                                                                                                                                             |                  |                   |                  |                 |                        |        |
|                                        |             |        |                        |                                                               |                                                                                                                                                             |                  |                   |                  |                 |                        |        |
| Adduct                                 | parent mass | RTMean | MS <sup>2</sup>        | Mol form.                                                     | Hit                                                                                                                                                         | Class            | PkArea GYM-liquid | PkArea MB-liquid | PkArea MB-solid | Confidence / Reference |        |
| SU126                                  |             |        |                        |                                                               |                                                                                                                                                             |                  |                   |                  |                 | 3                      |        |
| [M+H] <sup>+</sup>                     | 446.3269    | 10.8   | 166; 120               | C <sub>27</sub> H <sub>43</sub> NO <sub>4</sub>               | Phe-C19:0                                                                                                                                                   |                  | 0                 | 0                | 15635           | 3                      |        |
| [M+H-H <sub>2</sub> O] <sup>+</sup>    | 311.2584    | 10.5   | 219; 135; 121          | C <sub>19</sub> H <sub>36</sub> O <sub>4</sub>                | Monopalmitolein                                                                                                                                             |                  | 0                 | 984              | 9450            | 3 [7]                  |        |
| [M+H-H <sub>2</sub> O] <sup>+</sup>    | 237.2223    | 10.3   | 219; 135; 121; 107     | C <sub>16</sub> H <sub>30</sub> O <sub>2</sub>                | Palmitelaidic acid                                                                                                                                          | Fatty acid       | 0                 | 0                | 16237           | 3 [7]                  |        |
| [M-2H <sub>2</sub> O+H] <sup>+</sup>   | 464.2834    | 7.6    | 339; 321; 215; 126     | C <sub>26</sub> H <sub>41</sub> NO <sub>4</sub> S             | "2-((4R)-4-((3R,5R,9S,10S,12S,13R,14S,17R)-3,12-dihydroxy-10,13-dimethylhexadecahydro-1H-cyclopenta[a]phenanthren-17-yl)pentanamido)ethane-1-sulfonic acid" |                  | 0                 | 3759             | 0               | 3                      |        |
| [M+H] <sup>+</sup>                     | 298.2748    | 9.7    | 281; 215; 121          | C <sub>18</sub> H <sub>35</sub> NO <sub>2</sub>               |                                                                                                                                                             | Fatty acid       | 0                 | 60396            | 0               | 3                      |        |
| [M-2(H <sub>2</sub> O)+H] <sup>+</sup> | 414.2993    | 7.2    | 339; 321; 215          | C <sub>26</sub> H <sub>43</sub> NO <sub>5</sub>               | glycodeoxycholic acid                                                                                                                                       | Bile acid        | 0                 | 0                | 32357           | 3 [2]                  |        |
| [M+H] <sup>+</sup>                     | 329.2695    | 10.3   | 311; 219; 135          | C <sub>19</sub> H <sub>36</sub> O <sub>4</sub>                | Monopalmitolein                                                                                                                                             | lipid            | 0                 | 0                | 17376           | 3 [7]                  |        |
| [M+H] <sup>+</sup>                     | 271.2273    | 9.2    | 215; 123; 109          | C <sub>16</sub> H <sub>32</sub> O <sub>4</sub>                |                                                                                                                                                             |                  | 0                 | 0                | 24729           | 3                      |        |
| [M - H <sub>2</sub> O+H] <sup>+</sup>  | 311.2591    | 10.3   | 219; 135; 121; 109     | C <sub>19</sub> H <sub>36</sub> O <sub>4</sub>                | Monopalmitolein                                                                                                                                             | lipid            | 0                 | 0                | 26216           | 3 [7]                  |        |
| [M+H] <sup>+</sup>                     | 418.2954    | 9.9    | 166; 120               | C <sub>25</sub> H <sub>39</sub> NO <sub>4</sub>               | -                                                                                                                                                           | diketopiperazine | 0                 | 0                | 6754            | 3                      |        |
| [M+H] <sup>+</sup>                     | 419.3115    | 5.9    | 353; 335; 240; 144; 96 | C <sub>21</sub> H <sub>42</sub> N <sub>2</sub> O <sub>6</sub> | -                                                                                                                                                           | -                | 0                 | 8793             | 0               | 3                      |        |
| [M+H] <sup>+</sup>                     | 254.2485    | 10.2   | 237; 219; 149          | C <sub>16</sub> H <sub>32</sub> NO                            | -                                                                                                                                                           | -                | 0                 | 14315            | 0               | 4                      |        |
| [M+H] <sup>+</sup>                     | 595.5046    | 10.1   | 381; 115; 70           | C <sub>35</sub> H <sub>66</sub> N <sub>2</sub> O <sub>5</sub> | -                                                                                                                                                           | OL               | 0                 | 39818            | 0               | 4 [19]                 |        |
| [M-H] <sup>-</sup>                     | 716.5208    | 9.9    | -                      | C <sub>39</sub> H <sub>75</sub> NO <sub>8</sub> P             | PE(16:1/18:0)                                                                                                                                               | lipids           | 0                 | 2646             | 0               | 3 [5]                  |        |
| [M-H] <sup>-</sup>                     | 574.4405    | 11.2   | 350; 333               | C <sub>32</sub> H <sub>65</sub> NO <sub>5</sub> S             | Sulfobacin B                                                                                                                                                | lipids           | 0                 | 0                | 2007            | 3 [17]                 |        |

## References

- Sumner, L.W.; Amberg, A.; Barrett, D.; Beale, M.H.; Beger, R.; Daykin, C.A.; Fan, T.W.-M.; Fiehn, O.; Goodacre, R.; Griffin, J.L.; et al. Proposed minimum reporting standards for chemical analysis. *Metabolomics* **2007**, *3*, 211-221, doi:10.1007/s11306-007-0082-2.
- Li, H.; Shinde, P.B.; Lee, H.J.; Yoo, E.S.; Lee, C.-O.; Hong, J.; Choi, S.H.; Jung, J.H. Bile acid derivatives from a sponge-associated bacterium *Psychrobacter* sp. *Arch. Pharmacol Res.* **2009**, *32*, 857-862, doi:10.1007/s12272-009-1607-1.



3. da Costa, M.S.; Albuquerque, L.; Nobre, M.F.; Wait, R. The identification of fatty acids in bacteria. In *Methods in Microbiology*, Rainey, F., Oren, A., Eds.; Academic Press: 2011; Volume 38, pp. 183-196.
4. Vanounou, S.; Parola, A.H.; Fishov, I. Phosphatidylethanolamine and phosphatidylglycerol are segregated into different domains in bacterial membrane. A study with pyrene-labelled phospholipids. *Mol. Microbiol.* **2003**, *49*, 1067-1079, doi:10.1046/j.1365-2958.2003.03614.x.
5. Sohlenkamp, C.; Geiger, O. Bacterial membrane lipids: diversity in structures and pathways. *FEMS Microbiol. Rev.* **2015**, *40*, 133-159, doi:10.1093/femsre/fuv008.
6. Ma, L.; Zhang, Z.; Li, J.; Yang, X.; Fei, B.; Leung, P.H.; Tao, X. A new antimicrobial agent: poly (3-hydroxybutyric acid) oligomer. *Macromol. Biosci.* **2019**, *19*, 1800432, doi:10.1002/mabi.201800432.
7. Wang, M.; Carver, J.J.; Phelan, V.V.; Sanchez, L.M.; Garg, N.; Peng, Y.; Nguyen, D.D.; Watrous, J.; Kapon, C.A.; Luzzatto-Knaan, T.; et al. Sharing and community curation of mass spectrometry data with Global Natural Products Social Molecular Networking. *Nat. Biotechnol.* **2016**, *34*, 828-837, doi:10.1038/nbt.3597.
8. Kim, S.K.; Park, S.J.; Li, X.H.; Choi, Y.S.; Im, D.S.; Lee, J.H. Bacterial ornithine lipid, a surrogate membrane lipid under phosphate-limiting conditions, plays important roles in bacterial persistence and interaction with host. *Environ. Microbiol.* **2018**, *20*, 3992-4008, doi:10.1111/1462-2920.14430.
9. Czolkoss, S.; Borgert, P.; Poppenga, T.; Hölzl, G.; Aktas, M.; Narberhaus, F. Synthesis of the unusual lipid bis(monoacylglycero)phosphate in environmental bacteria. *Environ. Microbiol.* **2021**, *23*, 6993-7008, doi:10.1111/1462-2920.15777.
10. Vijayakumar, V.; Liebisch, G.; Buer, B.; Xue, L.; Gerlach, N.; Blau, S.; Schmitz, J.; Bucher, M. Integrated multi-omics analysis supports role of lysophosphatidylcholine and related glycerophospholipids in the *Lotus japonicus*-*Glomus intraradices* mycorrhizal symbiosis. *Plant, Cell Environ.* **2016**, *39*, 393-415, doi:10.1111/pce.12624.
11. Kakasi-Zsurka, S.; Todea, A.; But, A.; Paul, C.; Boeriu, C.G.; Davidescu, C.; Nagy, L.; Kuki, Á.; Kéki, S.; Péter, F. Biocatalytic synthesis of new copolymers from 3-hydroxybutyric acid and a carbohydrate lactone. *J. Mol. Catal. B: Enzym.* **2011**, *71*, 22-28, doi:10.1016/j.molcatb.2011.03.004.
12. de Carvalho, M.P.; Abraham, W.R. Antimicrobial and biofilm inhibiting diketopiperazines. *Curr. Med. Chem.* **2012**, *19*, 3564-3577, doi:10.2174/092986712801323243.
13. Petta, T.; Raichardt, L.; Melo, I.S.; Moraes, L.A.B. Bioassay-guided isolation of a low molecular weight PHB from *Burkholderia* sp. with phytotoxic activity. *Appl. Biochem. Biotechnol.* **2013**, *170*, 1689-1701, doi:10.1007/s12010-013-0292-1.
14. Dalton, B.; Bhagabati, P.; De Micco, J.; Padamati, R.B.; O'Connor, K. A review on biological synthesis of the biodegradable polymers polyhydroxyalkanoates and the development of multiple applications. *Catalysts* **2022**, *12*, 1-44, doi:10.3390/catal12030319.
15. Seebach, D.; Brändli, U.; Müller, H.-M.; Dobler, M.; Egli, M.; Przybylski, M.; Schneider, K. On the macrolactonization of  $\beta$ -hydroxy acids. Crystal structures of the pentolide and the hexolide from (*R*)-3-hydroxybutanoic acid. Molecular modeling studies of the tetrolide. *Helv. Chim. Acta* **1989**, *72*, 1704-1717, doi:10.1002/hlca.19890720807.

16. Seebach, D.; Brändli, U.; Schnurrenberger, P.; Przybylski, M. High-yield synthesis of 20-, 24-, and 28-membered macropentolide, -hexolide, and -heptolide, respectively, from (*R*)- or (*S*)-3-hydroxybutanoic acid under Yamaguchi's macrolactonization conditions. *Helv. Chim. Acta* **1988**, *71*, 155-167, doi:10.1002/hlca.19880710119.
17. Maeda, J.; Nishida, M.; Takikawa, H.; Yoshida, H.; Azuma, T.; Yoshida, M.; Mizushima, Y. Inhibitory effects of sulfobacin B on DNA polymerase and inflammation. *Int. J. Mol. Med.* **2010**, *26*, 751-758, doi:10.3892/ijmm\_00000522.
18. Kristoffersen, V.; Jenssen, M.; Jawad, H.R.; Isaksson, J.; Hansen, E.H.; Rämä, T.; Hansen, K.Ø.; Andersen, J.H. Two novel lyso-ornithine lipids isolated from an Arctic marine *Lacinutrix* sp. bacterium. *Molecules* **2021**, *26*, 1-14, doi:10.3390/molecules26175295.
19. Elshafie, H.S.; Viggiani, L.; Mostafa, M.S.; El-Hashash, M.A.; Camele, I.; Bufo, S.A. Biological activity and chemical identification of ornithine lipid produced by *Burkholderia gladioli* pv. *agaricola* ICMP 11096 using LC-MS and NMR analyses. *J. Biol. Res.* **2017**, *90*, 1-8, doi:10.4081/jbr.2017.6534
